# Supplementary material
Source: publisher figshare collection journal article supplement (https://acs.figshare.com/ndownloader/files/5187550)
Supplement: Supplementary file 1 [file 5187550]

# New Tools for Molecular Imaging of Redox Metabolism: Development of a Fluorogenic probe for 3 $\alpha$ -Hydroxysteroid Dehydrogenases

Dominic J. Yee, Vojtech Balsanek, Dalibor Sames\*

*Department of Chemistry, Columbia University, New York NY 10027  
sames@chem.columbia.edu*

## Supporting Information

### Materials and General methods

$^1\text{H}$  and  $^{13}\text{C}$  NMR spectra were recorded on Bruker 300 or 400 Fourier transform NMR spectrometers. Spectra were recorded in  $\text{CDCl}_3$  solutions referenced to TMS or the solvent residual peak unless otherwise indicated. IR spectra were taken as neat for liquids on NaCl plates or as KBr pellets for solids using a Perkin-Elmer 1600 FTIR spectrometer. High Resolution Mass Spectra were obtained on a JOEL JMS-HX110 HF mass spectrometer. Flash chromatography was performed on SILICYCLE silica gel (230-400 mesh). All chemicals were purchased from Aldrich and used as received. All reactions were monitored by Thin Layer Chromatography.

Ultraviolet spectra were measured on a Cary 100 UV-Visible spectrophotometer and recorded in EtOH solutions. Recorded  $\lambda_{\text{max}}$  is that of the longest wavelength transition. Fluorescence measurements were taken on a Jobin Yvon Fluorolog fluorescence spectrofluorometer in potassium phosphate pH 7.0 buffer unless otherwise indicated. Quantum yields were measured relative to 9, 10 diphenylanthracene in EtOH<sup>1</sup> for probes **1-4** and alcohols **8**, **11**, **13**, and **15**, or Coumarin 6 in EtOH<sup>2</sup> for probes **5-7** and alcohols **19**, **21**, and **22**. Reported quantum efficiencies are the average of at least three independent preparations of the probes and their cognate alcohols.

### Synthesis of Probes 1-7 and the Corresponding Alcohols

#### Synthesis of probe 1

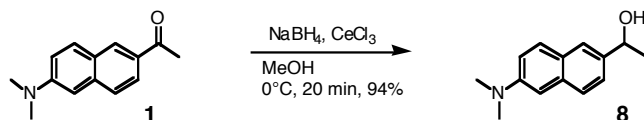

#### 1-(6-Dimethylamino-naphthalen-2-yl)-ethanone (**1**).

This compound was prepared by a literature procedure and spectral data are consistent with those previously published<sup>3</sup>.

### 1-(6-Dimethylamino-naphthalen-2-yl)-ethanol (8).

CeCl<sub>3</sub>·7H<sub>2</sub>O (116 mg, 0.31 mmol) was added to a solution of **1** (50 mg, 0.23 mmol) in MeOH (10 ml) at 0°C, followed by addition of NaBH<sub>4</sub> (46 mg, 1.22 mmol). After 20 minutes, the reaction was quenched with a saturated aqueous solution of NH<sub>4</sub>Cl and extracted with CHCl<sub>3</sub>. Organic layer was dried over MgSO<sub>4</sub>, evaporated and the crude product was purified by column chromatography on silica gel (CH<sub>2</sub>Cl<sub>2</sub>-EtOAc 98:2) to provide pure alcohol (47 mg, 94%).

**NMR** <sup>1</sup>H (300 MHz, CDCl<sub>3</sub>)  $\delta$  ppm:

7.67 (d, 1H, J1=9.0 Hz); 7.63 (bs, 1H); 7.63 (d, 1H, J1=8.5 Hz); 7.37 (dd, 1H, J1=8.5 Hz, J2=1.7 Hz); 7.15 (dd, 1H, J1=9.0 Hz, J2=2.5 Hz); 6.90 (d, 1H, J1=2.5 Hz); 4.99 (m, 1H); 3.03 (s, 6H); 1.79 (d, 1H, J1=3.5 Hz), 1.59 (d, 3H, J1=6.4 Hz).

**NMR** <sup>13</sup>C (300 MHz, CDCl<sub>3</sub>)  $\delta$  ppm:

148.7; 139.3; 134.5; 128.7; 126.6; 126.5; 124.2; 123.6; 116.7; 106.5; 70.6; 40.9; 24.9.

**IR** (NaCl, cm<sup>-1</sup>): 3358, 2969, 2875, 1632, 1606, 1507, 1444, 1382, 1334, 1171, 1069, 968, 845, 804, 676.

**HRMS** (FAB): 215.1308 (C<sub>14</sub>H<sub>17</sub>ON, M; calc 215.1310).

**UV** (EtOH):  $\lambda_{\text{max}}$  = 348 nm.

**Fluorescence** (potassium phosphate pH 7.0):  $\lambda_{\text{em}}$  = 429 nm,  $\phi_f$  = 0.07.

### Synthesis of probe 2

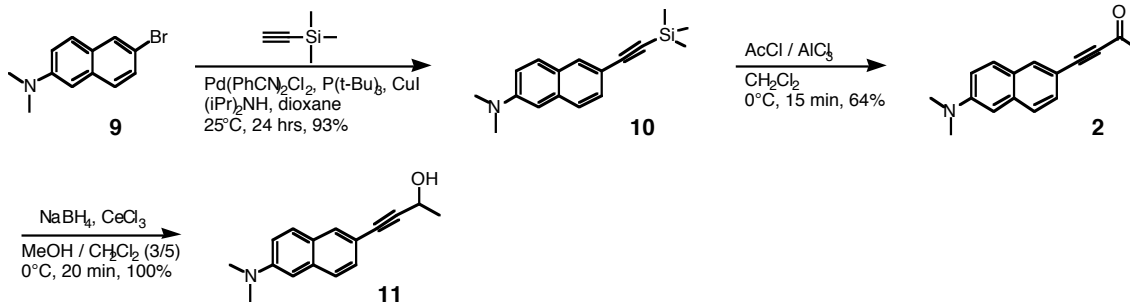

### Dimethyl-(6-trimethylsilyl-ethynyl-naphthalen-2-yl)-amine (10).

This compound was prepared by the procedure of Buchwald and Fu<sup>4</sup> from bromide **9**, which was obtained from 2-bromo-6-naphthol according to literature<sup>5</sup>. Pd(PhCN)<sub>2</sub>Cl<sub>2</sub> (4.6 mg, 0.012 mmol), CuI (1.5 mg, 0.008 mmol), **9** (100 mg, 0.400 mmol), dioxane (1 ml), diisopropylamine (68  $\mu$ l, 0.024 mmol) and (trimethylsilyl)acetylene (110  $\mu$ l, 0.800 mmol) were mixed in a vial under argon and allow to stir 24 hrs at room temperature. The resultant mixture was diluted with EtOAc, washed with brine and dried over MgSO<sub>4</sub>. Following solvent evaporation and product purification by column chromatography using silica gel and hexanes-EtOAc 98:2, **10** was yielded (99 mg, 93%).

**NMR** <sup>1</sup>H (300 MHz, CDCl<sub>3</sub>)  $\delta$  ppm:

7.81 (bs, 1H); 7.61 (d, 1H, J1=9.1 Hz); 7.52 (d, 1H, J1=8.5 Hz); 7.36 (dd, 1H, J1=8.5 Hz, J2=1.6 Hz); 7.11 (dd, 1H, J1=9.1 Hz, J2=2.5 Hz); 6.83 (d, 1H, J1=2.5 Hz); 3.05 (s, 6H); 0.27 (s, 9H).  
**NMR**  $^{13}\text{C}$  (300 MHz, acetone- $d_6$ )  $\delta$  ppm:  
150.4; 135.8; 132.3; 129.5; 129.3; 127.0; 126.8; 117.6; 116.5; 107.4; 106.5; 92.9; 40.6; 0.1.  
**IR** (NaCl,  $\text{cm}^{-1}$ ): 2960, 2901, 2812, 2147, 1629, 1598, 1247, 894, 850, 838, 809.  
**HRMS** (FAB): 267.1442 ( $\text{C}_{17}\text{H}_{21}\text{NSi}$ , M; calc 267.1443).

#### 4-(6-Dimethylamino-naphthalen-2-yl)-but-3-yn-2-one (2).

AcCl (13  $\mu\text{l}$ , 0.18 mmol) was added to a solution of **10** (43 mg, 0.16 mmol) in  $\text{CH}_2\text{Cl}_2$  (2 ml) at  $0^\circ\text{C}$ , followed by addition of  $\text{AlCl}_3$  (107 mg, 0.80 mmol). After 15 minutes, the reaction was quenched with  $\text{H}_2\text{O}$  and extracted with EtOAc. After the organic layer was dried over  $\text{MgSO}_4$ , the solvent was removed, and the residue was purified by column chromatography on silica gel (hexanes-EtOAc 98:2) to yield ketone **2** (55 mg, 64%).

**NMR**  $^1\text{H}$  (300 MHz,  $\text{CDCl}_3$ )  $\delta$  ppm:  
7.96 (bs, 1H); 7.66 (d, 1H, J1=9.1 Hz); 7.56 (d, 1H, J=8.5 Hz); 7.41 (dd, 1H, J1=8.5 Hz, J2=1.6 Hz); 7.14 (dd, 1H, J1=9.1 Hz, J2=2.5 Hz); 6.82 (d, 1H, J1=2.5 Hz); 3.09 (s, 6H); 2.46 (s, 3H).  
**NMR**  $^{13}\text{C}$  (300 MHz,  $\text{CDCl}_3$ )  $\delta$  ppm:  
184.6; 149.8; 135.9; 134.6; 129.3; 129.1; 126.3; 125.5; 116.5; 111.9; 105.4; 93.1; 88.5; 40.4; 32.7.  
**IR** (NaCl,  $\text{cm}^{-1}$ ): 2892, 2817, 2180, 1667, 1625, 1507, 1354, 1280, 1190, 1168, 896, 851, 810.  
**HRMS** (FAB): 237.1138 ( $\text{C}_{16}\text{H}_{15}\text{ON}$ , M; calc 237.1154).  
**UV** (EtOH):  $\lambda_{\text{max}}$  = 389 nm.  
**Fluorescence** (potassium phosphate pH 7.0): 448 nm,  $\phi_f$  = 0.00.

#### 4-(6-Dimethylamino-naphthalen-2-yl)-but-3-yn-2-ol (11).

Reduction of **2** (20 mg, 0.084 mmol) in MeOH- $\text{CH}_2\text{Cl}_2$  3:5 (5ml) followed a procedure analogous to that used for the preparation of **8**. Column chromatography on silica gel ( $\text{CH}_2\text{Cl}_2$ ) afforded alcohol **11** (20 mg, 100%).

**NMR**  $^1\text{H}$  (300 MHz,  $\text{CDCl}_3$ )  $\delta$  ppm:  
7.77 (bs, 1H); 7.61 (d, 1H, J1=9.1 Hz); 7.54 (d, 1H, J1=8.5 Hz); 7.33 (dd, 1H, J1=8.5 Hz, J2=1.5 Hz); 7.12 (dd, 1H, J1=9.1 Hz, J2=2.4 Hz); 6.83 (d, 1H, J1=2.4 Hz); 4.78 (m, 1H); 3.05 (s, 6H); 1.88 (d, 1H, J1=4.8 Hz); 1.57 (d, 3H, J1=6.5 Hz).  
**NMR**  $^{13}\text{C}$  (300 MHz,  $\text{CDCl}_3$ )  $\delta$  ppm:  
149.1; 134.5; 131.4; 128.8; 128.7; 126.1; 126.0; 116.6; 115.3; 105.9; 89.9; 85.0; 59.0; 40.6; 24.5.  
**IR** (NaCl,  $\text{cm}^{-1}$ ): 3346, 2982, 2930, 2882, 1628, 1598, 1505, 1389, 1101, 1072, 1035, 893, 848, 809.  
**HRMS** (FAB): 239.1305 ( $\text{C}_{16}\text{H}_{17}\text{ON}$ , M; calc 239.1310).  
**UV** (EtOH):  $\lambda_{\text{max}}$  = 361 nm.  
**Fluorescence** (potassium phosphate pH 7.0): 440 nm,  $\phi_f$  = 0.08.

## Synthesis of probe 3

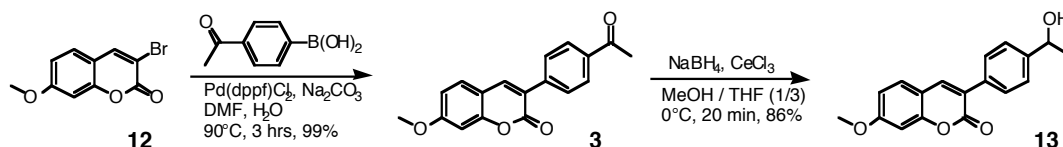

### 3-(4-Acetyl-phenyl)-7-methoxy-coumarin (3).

Bromide **12** (400 mg, 1.57 mmol), obtained by bromination of 7-methoxycoumarin, was mixed with 4-acetylphenylboronic acid (283 mg, 1.72 mmol), PdCl<sub>2</sub>dppf (40 mg, 0.047 mmol), Na<sub>2</sub>CO<sub>3</sub> (831 mg, 7.84 mmol), H<sub>2</sub>O (3.92 ml) and DMF (16 ml) under argon. The resulting mixture was heated to 90°C and stirred until completion (3 hrs). The cooled mixture was then diluted with water and extracted with CH<sub>2</sub>Cl<sub>2</sub>. Combined organic fractions were dried over MgSO<sub>4</sub>. Following the evaporation of solvent, the residue was purified by column chromatography on silica gel (CH<sub>2</sub>Cl<sub>2</sub>) to afford desired product **3** (456 mg, 99%).

**NMR** <sup>1</sup>H (300 MHz, CDCl<sub>3</sub>) □ ppm:

8.00 (m, 2H); 7.83 (m, 2H); 7.77 (bs, 1H); 7.46 (d, 1H, J<sub>1</sub>=8.4 Hz); 6.88 (m, 2H); 3.90 (s, 3H); 2.64 (s, 3H).

**NMR** <sup>13</sup>C (300 MHz, CDCl<sub>3</sub>) □ ppm:

197.6; 163.1; 160.5; 155.6; 141.0; 139.6; 136.6; 129.2; 128.5; 128.4; 123.5; 113.1; 113.1; 100.4; 55.9; 26.7.

**IR** (NaCl, cm<sup>-1</sup>): 3070, 2962, 1710, 1670, 1613, 1505, 1442, 1360, 1275, 1198, 1122, 1022, 929, 859, 829, 776.

**HRMS** (FAB): 295.0967 (C<sub>18</sub>H<sub>15</sub>O<sub>4</sub>, M+1; calc 295.0970).

**UV** (EtOH): □<sub>max</sub> = 348 nm.

**Fluorescence** (potassium phosphate pH 7.0): 462 nm, □<sub>f</sub> = 0.00.

### 3-[4-(1-Hydroxy-ethyl)-phenyl]-7-methoxy-coumarin (13).

Reduction of **3** (42 mg, 0.14 mmol) in MeOH-THF 1:3 (15ml) proceeded as described for the preparation of **8**. Column chromatography on silica gel (eluent gradient: CH<sub>2</sub>Cl<sub>2</sub> to CH<sub>2</sub>Cl<sub>2</sub>-EtOAc 8:2) afforded alcohol **13** (36 mg, 86%).

**NMR** <sup>1</sup>H (300 MHz, CDCl<sub>3</sub>) □ ppm:

7.75 (s, 1H); 7.67 (m, 2H); 7.44 (m, 3H); 4.95 (m, 1H); 3.89 (s, 3H); 1.85 (d, 1H, J<sub>1</sub>=3.4 Hz); 1.52 (d, 3H, J<sub>1</sub>=6.4 Hz).

**NMR** <sup>13</sup>C (300 MHz, CDCl<sub>3</sub>) □ ppm:

162.5; 160.9; 155.2; 146.1; 139.8; 134.0; 128.8; 128.4; 125.4; 124.4; 113.3; 112.7; 100.3; 70.0; 55.7; 25.1.

**IR** (NaCl, cm<sup>-1</sup>): 3415, 2971, 1719, 1611, 1057, 1443, 1364, 1271, 1202, 1163, 1120, 1089, 1026, 832.

**HRMS** (FAB): 297.1112 (C<sub>18</sub>H<sub>17</sub>O<sub>4</sub>, M+1; calc 297.1127).

**UV** (EtOH): □<sub>max</sub> = 342 nm.

**Fluorescence** (potassium phosphate pH 7.0): 429 nm, □<sub>f</sub> = 0.12.

## Synthesis of probe 4



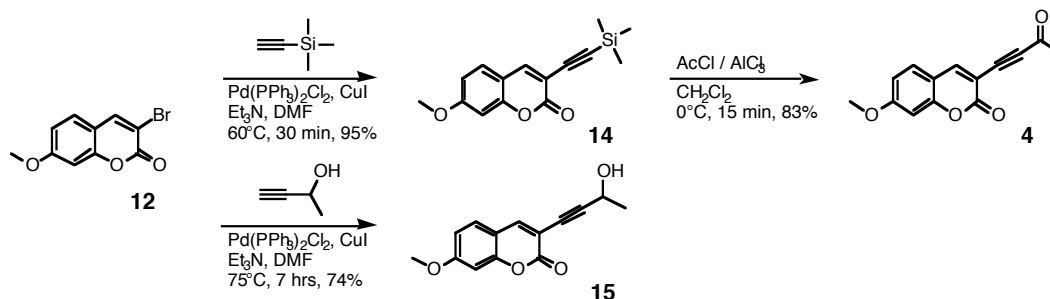

### 7-Methoxy-3-(trimethylsilyl)ethynyl-coumarin (**14**).

$\text{PdCl}_2(\text{PPh}_3)_2$  (28 mg, 0.04 mmol), CuI (8 mg, 0.04 mmol),  $\text{Et}_3\text{N}$  (278  $\mu\text{l}$ , 2.00 mmol) and (trimethylsilyl)acetylene (138  $\mu\text{l}$ , 1.50 mmol) were added to a solution of bromide **12** (255 mg, 1.00 mmol) in dry DMF (10 ml) under argon. The resulting solution was heated to 60°C and allowed to react 30 minutes. The mixture was then cooled, diluted with water, and extracted with  $\text{CH}_2\text{Cl}_2$ . The organic fractions were then combined and dried over  $\text{MgSO}_4$ . Removal of solvent *in vacuo* and purification of the residue by column chromatography on silica gel ( $\text{CH}_2\text{Cl}_2$ ) afforded product **14** (259 mg, 95%).

**NMR**  $^1\text{H}$  (300 MHz,  $\text{CDCl}_3$ )  $\delta$  ppm:

7.82 (s, 1H); 7.32 (d, 1H,  $J_1=8.6$  Hz); 6.83 (dd, 1H,  $J_1=8.6$  Hz,  $J_2=2.4$  Hz); 6.78 (d, 1H,  $J_1=2.4$  Hz); 3.86 (s, 3H); 0.26 (s, 9H).

**NMR**  $^{13}\text{C}$  (300 MHz, acetone- $d_6$ )  $\delta$  ppm:

164.6; 159.5; 156.5; 147.5; 130.4; 113.8; 113.2; 109.3; 101.3; 100.2; 99.8; 56.5; -0.2.

**IR** (NaCl,  $\text{cm}^{-1}$ ): 3040, 2961, 2840, 1721, 1600, 1441, 1368, 1272, 1247, 1034, 973, 831, 807, 765.

**HRMS** (FAB): 272.0869 ( $\text{C}_{15}\text{H}_{16}\text{O}_3\text{Si}$ , M; calc 272.0869).

### 7-Methoxy-3-(3-oxo-but-1-ynyl)-coumarin (**4**).

Compound **14** (103 mg, 0.38 mmol) was converted into ketone **4** by the procedure used for the preparation of **2**. Column chromatography of the crude product on silica gel ( $\text{CH}_2\text{Cl}_2$ ) provided **4** (76 mg, 83%).

**NMR**  $^1\text{H}$  (300 MHz,  $\text{CDCl}_3$ )  $\delta$  ppm:

8.00 (bs, 1H); 7.40 (d, 1H,  $J_1=8.7$  Hz); 6.88 (dd, 1H,  $J_1=8.7$  Hz,  $J_2=2.3$  Hz); 6.81 (d, 1H,  $J_1=2.3$  Hz); 3.90 (s, 3H); 2.47 (s, 3H).

**NMR**  $^{13}\text{C}$  (300 MHz,  $\text{CDCl}_3$ )  $\delta$  ppm:

184.1, 164.7; 158.9; 156.3; 149.8; 129.7; 113.8; 112.1; 106.0; 100.9; 92.2; 84.1; 56.0; 32.6.

**IR** (NaCl,  $\text{cm}^{-1}$ ): 3046, 2197, 1725, 1664, 1617, 1596, 1557, 1504, 1368, 1273, 1250, 1152, 1116, 1019, 836.

**HRMS** (FAB): 242.0572 ( $\text{C}_{14}\text{H}_{10}\text{O}_4$ , M+1; calc. 242.0579).

**UV** (EtOH):  $\lambda_{\text{max}}$  = 368 nm.

**Fluorescence** (potassium phosphate pH 7.0): 416 nm,  $\phi_f$  = 0.00.

### 3-(3-Hydroxy-but-1-ynyl)-7-methoxy-coumarin (**15**).

Alcohol **15** was prepared by Sonogashira coupling of bromide **12** (100 mg, 0.39 mmol) and but-3-yn-2-ol (32  $\mu\text{l}$ , 0.43 mmol) under conditions similar to that used for the

preparation of **14**. After 7 hours at 75°C, the reaction was complete. The crude alcohol was purified by column chromatography on silica gel (CH<sub>2</sub>Cl<sub>2</sub>-EtOAc 95:5) to afford product **15** (96 mg, 74%).

**NMR** <sup>1</sup>H (300 MHz, CDCl<sub>3</sub>)  $\delta$  ppm:

7.81 (bs, 1H); 7.35 (d, 1H, J1=8.6 Hz); 6.86 (dd, 1H, J1=8.6 Hz, J2=2.4 Hz); 6.81 (d, 1H, J1=2.4 Hz); 4.79 (m, 1H); 3.88 (s, 3H); 2.26 (d, 1H, J1=5.2 Hz); 1.56 (d, 3H, J1=6.6 Hz).

**NMR** <sup>13</sup>C (300 MHz, CDCl<sub>3</sub>)  $\delta$  ppm:

163.3; 160.1; 155.2; 145.5; 128.8; 113.2; 112.4; 108.6; 100.7; 96.7; 77.9; 58.7; 55.8; 24.0.

**IR** (NaCl, cm<sup>-1</sup>): 3414, 2983, 2939, 2843, 1733, 1618, 1506, 1365, 1269, 1121, 1024, 768.

**HRMS** (FAB): 244.0744 (C<sub>14</sub>H<sub>12</sub>O<sub>4</sub>, M; calc 244.0736).

**UV** (EtOH):  $\lambda_{\text{max}}$  = 346 nm.

**Fluorescence** (potassium phosphate pH 7.0): 420 nm,  $\phi_f$  = 0.18.

## Synthesis of probe 5

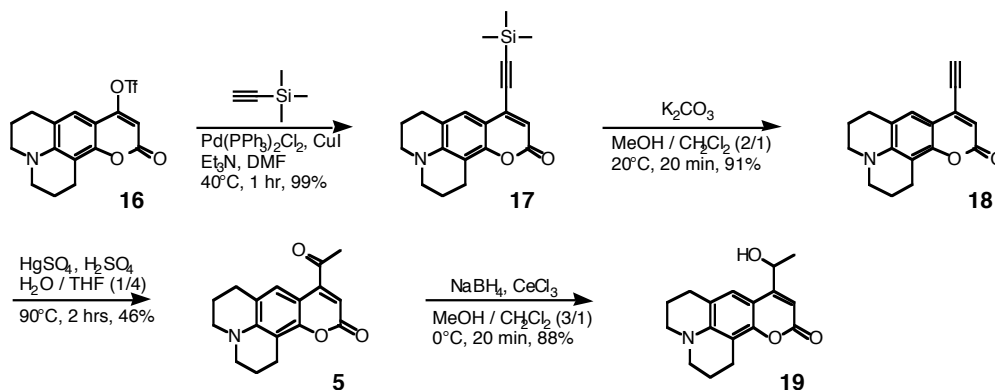

## 8-Trimethylsilanylethynyl-2,3,5,6-tetrahydro-1H, 4H-11-oxa-3a-aza-benzo[de]anthracen-10-one (**17**).

Triflate **16** (707mg, 1.82 mmol), obtained from 8-hydroxyjulolidine according to the literature<sup>6</sup>, was coupled with (trimethylsilyl)acetylene (377  $\mu$ l, 2.72 mmol) under conditions described for the preparation of **14**. The reaction was complete after 1 hr at 40°C. Column chromatography on silica gel (CH<sub>2</sub>Cl<sub>2</sub>) provided desired product **17** (607 mg, 99%).

**NMR** <sup>1</sup>H (300 MHz, CDCl<sub>3</sub>)  $\delta$  ppm:

7.16 (s, 1H); 6.11 (s, 1H); 3.26 (m, 4H); 2.83 (m, 4H); 1.97 (m, 4H); 0.31 (s, 9H).

**NMR** <sup>13</sup>C (300 MHz, CDCl<sub>3</sub>)  $\delta$  ppm:

161.8; 151.1; 146.1; 137.0; 123.5; 118.3; 110.8; 107.6; 106.6; 106.3; 98.8; 49.9; 49.4; 27.6; 21.4; 20.4; 20.2; -0.4.

**IR** (NaCl, cm<sup>-1</sup>): 2946, 2848, 1701, 1612, 1546, 1511, 1421, 1367, 1310, 1245, 1184, 843.

**HRMS** (FAB): 338.1574 (C<sub>20</sub>H<sub>24</sub>O<sub>2</sub>NSi, M+1; calc 338.1576).

**8-Ethynyl-2,3,5,6-tetrahydro-1H, 4H-11-oxa-3a-aza-benzo[de]anthracen-10-one (18).**

Powdered K<sub>2</sub>CO<sub>3</sub> (600 mg) was added to a solution of **17** (580 mg, 1.72 mmol) in MeOH-CH<sub>2</sub>Cl<sub>2</sub> 2:1 (30 ml). The mixture was stirred at room temperature until the reaction was complete (20 min). Reaction mixture was diluted with CHCl<sub>3</sub>, filtered, and washed with brine. The resultant organic layers were combined and dried over MgSO<sub>4</sub>, after which the solvent was removed *in vacuo*. Purification by column chromatography on silica gel (eluent gradient: CH<sub>2</sub>Cl<sub>2</sub> to CH<sub>2</sub>Cl<sub>2</sub>-EtOAc 95:5) afforded terminal alkyne **18** (416 mg, 91%).

**NMR** <sup>1</sup>H (300 MHz, CDCl<sub>3</sub>)  $\delta$  ppm:

7.19 (s, 1H); 6.16 (s, 1H); 3.58 (s, 1H); 3.27 (m, 4H); 2.87 (m, 2H); 2.78 (m, 2H); 1.97 (m, 4H).

**NMR** <sup>13</sup>C (300 MHz, CDCl<sub>3</sub>)  $\delta$  ppm:

161.6; 151.1; 146.3; 136.3; 123.4; 118.5; 111.7; 107.6; 106.4; 87.5; 78.0; 49.9; 49.5; 27.5; 21.3; 20.4; 20.2.

**IR** (NaCl, cm<sup>-1</sup>): 3221, 2931, 2838, 2103, 1699, 1616, 1519, 1428, 1371, 1311, 1176, 826.

**HRMS** (FAB): 266.1193 (C<sub>17</sub>H<sub>16</sub>O<sub>2</sub>N, M+1; calc 266.1181).

**8-Acetyl-2,3,5,6-tetrahydro-1H, 4H-11-oxa-3a-aza-benzo[de]anthracen-10-one (5).**

HgSO<sub>4</sub> (112 mg, 0.38 mmol) was added to a solution of **18** (100 mg, 0.38 mmol) in THF (8 ml), followed by addition of conc. H<sub>2</sub>SO<sub>4</sub> (105  $\mu$ l, 1.88 mmol) in H<sub>2</sub>O (2ml). The reaction mixture was heated in a sealed tube at 90°C for 2 hrs. After cooling to room temperature, a spatula tip of NaHCO<sub>3</sub> was added and the mixture was evaporated to dryness. MgSO<sub>4</sub> was added and the residual solids were washed thoroughly with CHCl<sub>3</sub>. The solvent was the evaporated and the residue purified by column chromatography on silica gel (CH<sub>2</sub>Cl<sub>2</sub>-Et<sub>2</sub>O 95:5) yielding ketone **5** (49 mg, 46%).

**NMR** <sup>1</sup>H (300 MHz, CDCl<sub>3</sub>)  $\delta$  ppm:

7.18 (s, 1H); 6.13 (s, 1H); 3.27 (m, 4H); 2.88 (m, 2H); 2.74 (m, 2H); 2.55 (s, 3H); 1.96 (m, 4H).

**NMR** <sup>13</sup>C (300 MHz, CDCl<sub>3</sub>)  $\delta$  ppm:

200.4; 162.1; 152.1; 150.8; 146.2; 123.2; 118.7; 106.8; 106.8; 103.7; 49.9; 49.4; 29.7; 27.6; 21.3; 20.4; 20.3.

**IR** (NaCl, cm<sup>-1</sup>): 2933, 2844, 1694, 1611, 1544, 1525, 1434, 1373, 1352, 1311, 1232, 1170, 1148.

**HRMS** (FAB): 283.1195 (C<sub>17</sub>H<sub>17</sub>O<sub>3</sub>N, M; calc 283.1208).

**UV** (EtOH):  $\lambda_{\text{max}}$  = 418 nm.

**Fluorescence** (potassium phosphate pH 7.0): 520 nm,  $\phi_f$  = 0.00.

**8-(1-Hydroxy-ethyl)-2,3,5,6-tetrahydro-1H, 4H-11-oxa-3a-aza-benzo[de]anthracen-10-one (19).**

Reduction of **5** (16 mg, 0.056 mmol) in MeOH-CH<sub>2</sub>Cl<sub>2</sub> 3:1 (5ml) proceeded by previously described procedures (used for preparation of **8**). Column chromatography on silica gel (eluent gradient: CH<sub>2</sub>Cl<sub>2</sub> to CH<sub>2</sub>Cl<sub>2</sub>-EtOAc 9:1) afforded alcohol **19** (14 mg, 88%).

**NMR** <sup>1</sup>H (300 MHz, CDCl<sub>3</sub>)  $\delta$  ppm:

7.01 (s, 1H); 6.24 (s, 1H); 5.14 (m, 1H); 3.26 (m, 4H); 2.87 (m, 2H); 2.77 (m, 2H); 2.07 (d, 1H, J=3.8 Hz); 2.10 (m, 4H); 1.55 (d, 3H, J=6.5 Hz).

**NMR**  $^{13}\text{C}$  (300 MHz,  $\text{CDCl}_3$ )  $\delta$  ppm:  
163.0; 159.4; 151.4; 145.6; 121.0; 118.0; 107.1; 105.9; 103.8; 65.9; 49.9; 49.5; 27.8; 23.6; 21.5; 20.6; 20.5.

**IR** (NaCl,  $\text{cm}^{-1}$ ): 3396, 2936, 2843, 1688, 1611, 1554, 1520, 1433, 1372, 1311, 1183, 1133.

**HRMS** (FAB): 286.1437 ( $\text{C}_{17}\text{H}_{20}\text{O}_3\text{N}$ , M+1; calc 286.1443).

**UV** (EtOH):  $\lambda_{\text{max}}$  = 398 nm.

**Fluorescence** (potassium phosphate pH 7.0): 509 nm,  $\phi_f$  = 0.21.

## Synthesis of probe 6

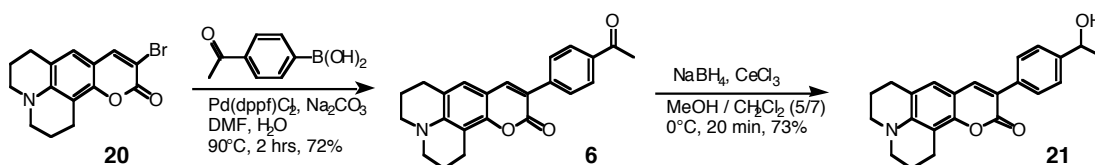

### 9-(4-Acetyl-phenyl)-2,3,5,6-tetrahydro-1H, 4H-11-oxa-3a-aza-benzo[de]anthracen-10-one (6).

Bromide **20** (100 mg, 0.31 mmol), obtained by bromination of coumarin 6H, was coupled with 4-acetylphenylboronic acid (77 mg, 0.46 mmol), under similar conditions as those used for preparation of **3**. Reaction was complete after 2 hrs at 90°C. Column chromatography on silica gel (eluent gradient:  $\text{CH}_2\text{Cl}_2$  to  $\text{CH}_2\text{Cl}_2$ -EtOAc 95:5) provided desired ketone **6** (81 mg, 72%).

**NMR**  $^1\text{H}$  (300 MHz,  $\text{CDCl}_3$ )  $\delta$  ppm:  
7.96 (m, 2H); 7.81 (m, 2H); 7.68 (s, 1H); 6.91 (s, 1H); 3.29 (m, 4H); 2.93 (m, 2H); 2.77 (m, 2H); 2.61 (s, 3H); 1.98 (m, 4H).

**NMR**  $^{13}\text{C}$  (300 MHz,  $\text{CDCl}_3$ )  $\delta$  ppm:  
197.7; 161.4; 151.5; 146.3; 141.7; 141.0; 135.6; 128.3; 128.0; 125.4; 118.7; 118.0; 108.7; 106.1; 50.0; 49.6; 27.4; 26.6; 21.4; 20.4; 20.2.

**IR** (NaCl,  $\text{cm}^{-1}$ ): 2941, 2845, 1699, 1677, 1616, 1594, 1563, 1518, 1360, 1306, 1269, 1213, 1171.

**HRMS** (FAB): 359.1527 ( $\text{C}_{23}\text{H}_{21}\text{O}_3\text{N}$ , M; calc 359.1521).

**UV** (EtOH):  $\lambda_{\text{max}}$  = 435 nm.

**Fluorescence** (potassium phosphate pH 7.0): 511 nm,  $\phi_f$  = 0.01.

### 9-[4-(1-Hydroxy-ethyl)-phenyl]-2,3,5,6-tetrahydro-1H, 4H-11-oxa-3a-aza-benzo[de]anthracen-10-one (21).

Reduction of **6** (15 mg, 0.041 mmol) in MeOH- $\text{CH}_2\text{Cl}_2$  5:7 (6ml) by the procedure used for preparation of **8** and recrystallization from  $\text{CHCl}_3$ -hexanes afforded alcohol **21** (11 mg, 73%).

**NMR**  $^1\text{H}$  (300 MHz,  $\text{CDCl}_3$ )  $\delta$  ppm:

7.66 (m, 2H); 7.58 (s, 1H); 7.40 (m, 2H); 6.88 (s, 1H); 4.92 (q, 1H, J1=6.4 Hz); 3.28 (m, 4H); 2.92 (m, 2H); 2.76 (m, 2H); 1.98 (m, 4H); 1.81 (bs, 1H); 1.51 (d, 3H, J1=6.4 Hz).

**NMR**  $^{13}\text{C}$  (300 MHz,  $\text{CDCl}_3$ )  $\delta$  ppm:

161.9; 151.2; 145.8; 145.1; 140.8; 135.3; 128.3; 125.3; 125.1; 119.6; 118.5; 109.0; 106.3; 70.2; 50.0; 49.6; 27.5; 25.1; 21.5; 20.6; 20.3.

**IR** (NaCl,  $\text{cm}^{-1}$ ): 3408, 2930, 2844, 1694, 1615, 1599, 1564, 1519, 1309, 1209, 1170, 839, 748.

**HRMS** (FAB): 361.1673 ( $\text{C}_{23}\text{H}_{23}\text{O}_3\text{N}$ , M; calc 361.1678).

**UV** (EtOH):  $\lambda_{\text{max}}$  = 422 nm.

**Fluorescence** (potassium phosphate pH 7.0): 509 nm,  $\phi_f$  = 0.14.

## Synthesis of probe 7

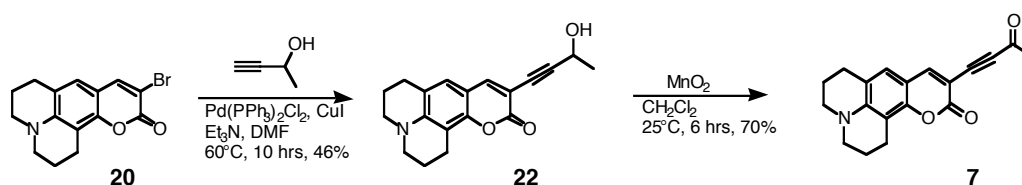

### 9-(3-Hydroxy-but-1-ynyl)-2,3,5,6-tetrahydro-1H, 4H-11-oxa-3a-aza-benzo[de]anthracen-10-one (**22**).

Alcohol **22** was prepared by Sonogashira coupling of bromide **20** (100 mg, 0.31 mmol) and but-3-yn-2-ol (26  $\mu\text{l}$ , 0.34 mmol) as described for the preparation of **14**. The reaction was stopped after 10 hrs at 60°C. Column chromatography on silica gel (eluent gradient:  $\text{CH}_2\text{Cl}_2$  to  $\text{CH}_2\text{Cl}_2$ -EtOAc 9:1) provided **22** (45 mg, 46%).

**NMR**  $^1\text{H}$  (300 MHz,  $\text{CDCl}_3$ )  $\delta$  ppm:

7.60 (s, 1H); 6.78 (s, 1H); 4.77 (m, 1H); 3.28 (m, 4H); 2.87 (m, 2H); 2.75 (m, 2H); 2.14 (d, 1H, J1=4.9 Hz); 1.97 (m, 4H); 1.54 (d, 3H, J1=6.6 Hz).

**NMR**  $^{13}\text{C}$  (300 MHz,  $\text{CDCl}_3$ )  $\delta$  ppm:

161.6; 151.3; 146.6; 146.4; 125.0; 118.9; 108.1; 106.4; 102.8; 94.7; 79.3; 58.9; 50.1; 49.7; 27.4; 24.1; 21.3; 20.4; 20.2.

**IR** (NaCl,  $\text{cm}^{-1}$ ): 3397, 2934, 2849, 1709, 1692, 1616, 1594, 1518, 1360, 1309, 1290, 1169, 765.

**HRMS** (FAB): 309.1365 ( $\text{C}_{19}\text{H}_{19}\text{O}_3\text{N}$ , M; calc 309.1365).

**UV** (EtOH):  $\lambda_{\text{max}}$  = 429 nm.

**Fluorescence** (potassium phosphate pH 7.0): 508 nm,  $\phi_f$  = 0.35.

### 9-(3-Oxo-but-1-ynyl)-2,3,5,6-tetrahydro-1H, 4H-11-oxa-3a-aza-benzo[de]anthracen-10-one (**7**).

To alcohol **22** (30 mg, 0.097 mmol) dissolved in dry  $\text{CH}_2\text{Cl}_2$  (3 ml) was added powdered  $\text{MnO}_2$  (150 mg) at room temperature. The resulting suspension was stirred until the reaction was complete (6 hrs). The subsequent mixture was filtered through Celite, dried *in vacuo*, and purified by column chromatography on silica gel (eluent gradient:  $\text{CH}_2\text{Cl}_2$  to  $\text{CH}_2\text{Cl}_2$ -EtOAc 98:2) to afford **7** (21 mg, 70%).

**NMR**  $^1\text{H}$  (300 MHz,  $\text{CDCl}_3$ )  $\delta$  ppm:

7.77 (s, 1H); 6.82 (s, 1H); 3.33 (m, 4H); 2.86 (m, 2H); 2.75 (m, 2H); 2.44 (s, 3H); 1.97 (m, 4H).  
**NMR**  $^{13}\text{C}$  (300 MHz,  $\text{CDCl}_3$ )  $\delta$  ppm:  
 184.3; 160.6; 152.3; 150.2; 148.2; 125.9; 119.4; 108.1; 106.2; 98.8; 92.4; 87.9; 50.2; 49.8; 32.5; 27.3; 21.0; 20.1; 20.0.  
**IR** ( $\text{NaCl}$ ,  $\text{cm}^{-1}$ ): 2937, 2844, 2170, 1714, 1657, 1620, 1586, 1520, 1358, 1295, 1154, 760.  
**HRMS** (FAB): 308.1295 ( $\text{C}_{19}\text{H}_{18}\text{O}_3\text{N}$ ,  $M+1$ ; calc 308.1287).  
**UV** ( $\text{EtOH}$ ):  $\lambda_{\text{max}}$  = 464 nm.  
**Fluorescence** (potassium phosphate pH 7.0): 512 nm,  $\phi_f$  = 0.01.

### **Fluorescence Spectra of Selected Probes 1-7:**

Compounds 1-4 were excited at 340 nm, while compounds 5-7 were excited at 440 nm. Fluorescence emission spectra were recorded with 10  $\mu\text{M}$  solutions (<1% DMSO v/v) in 100 mM potassium phosphate buffer (pH 7.0).

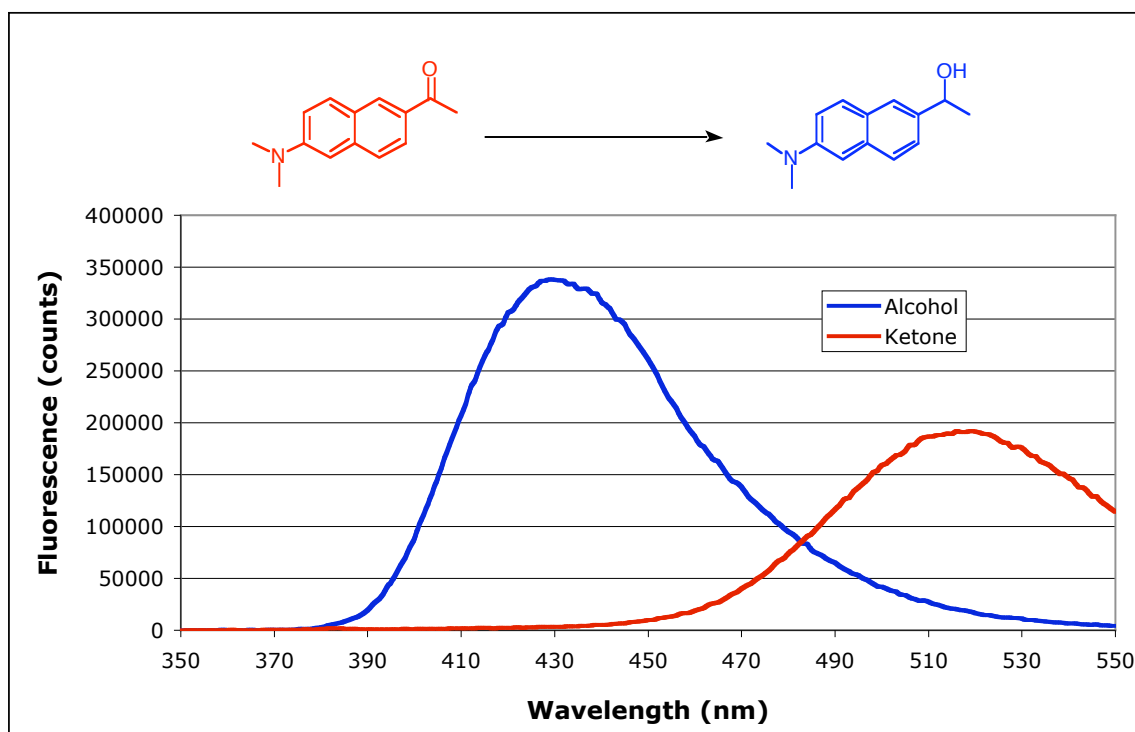

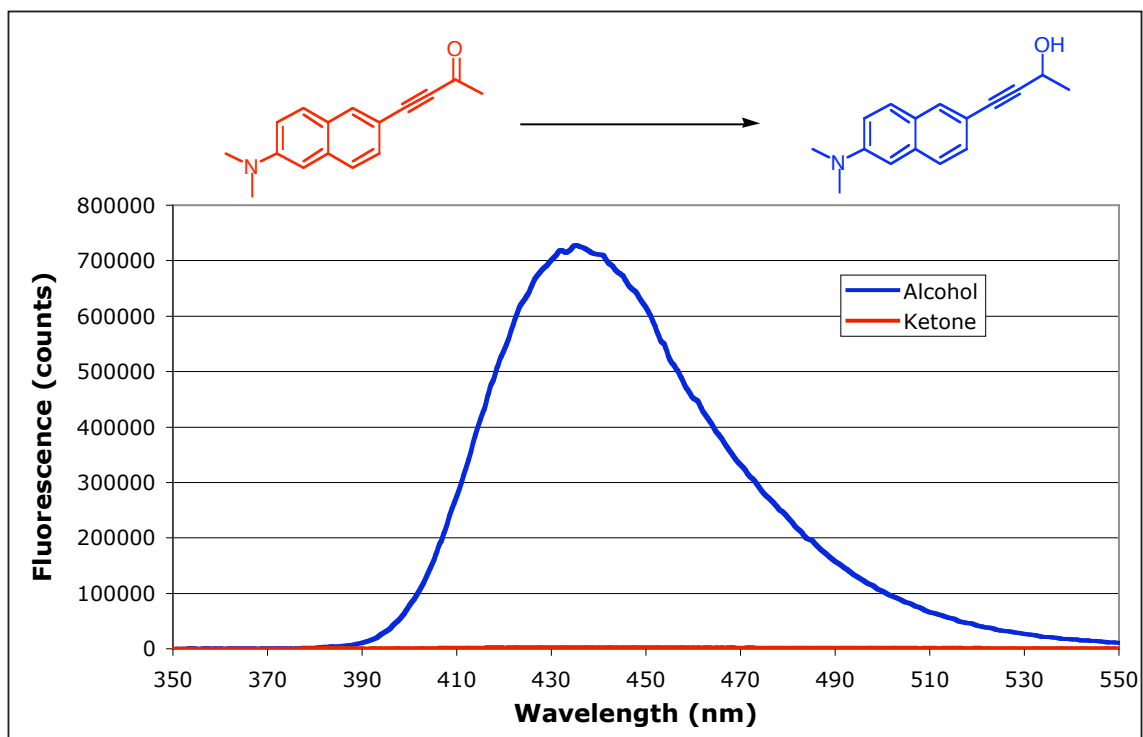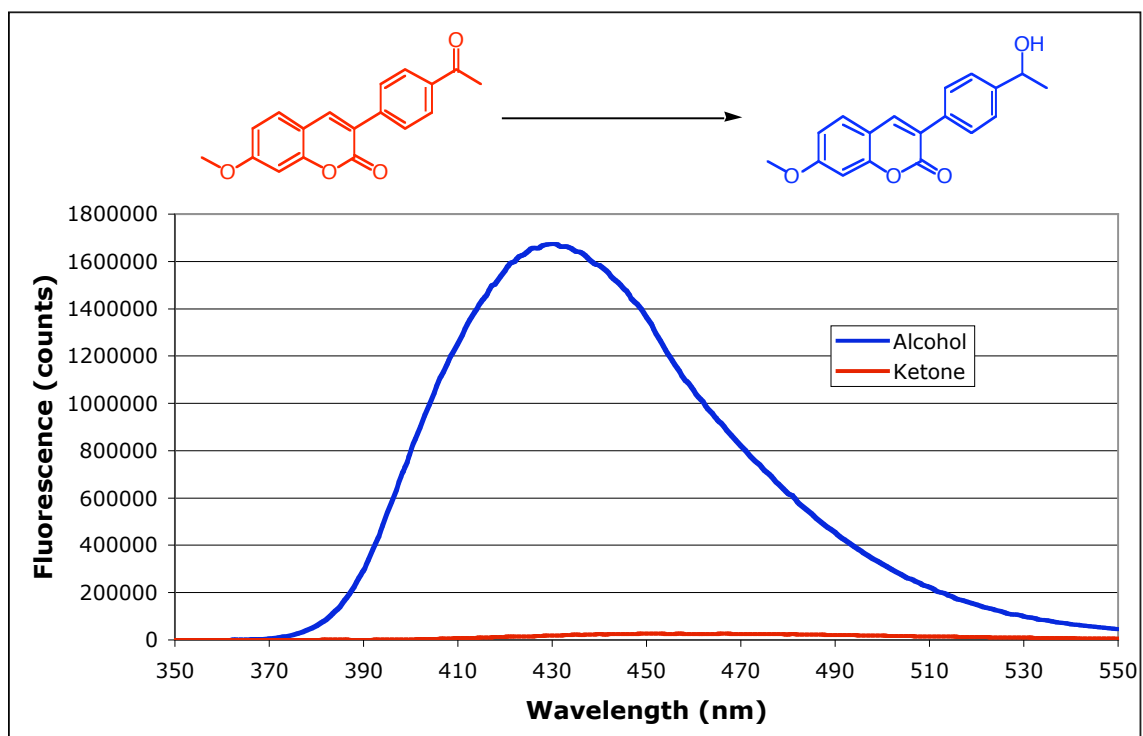

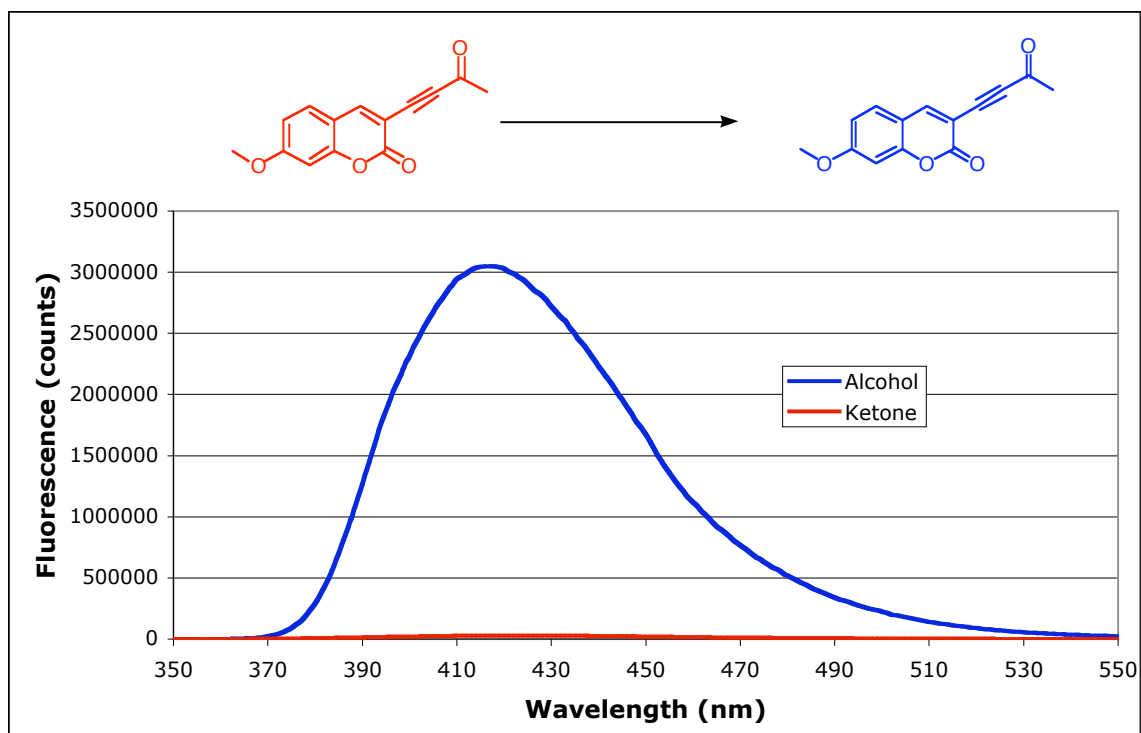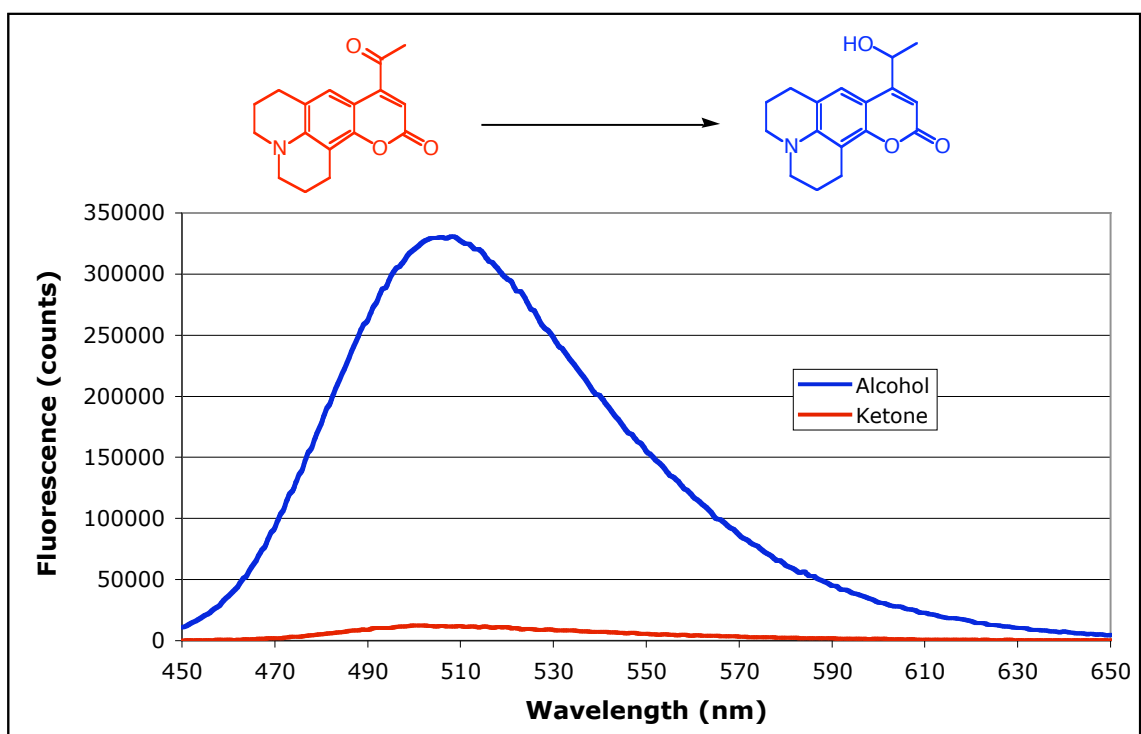



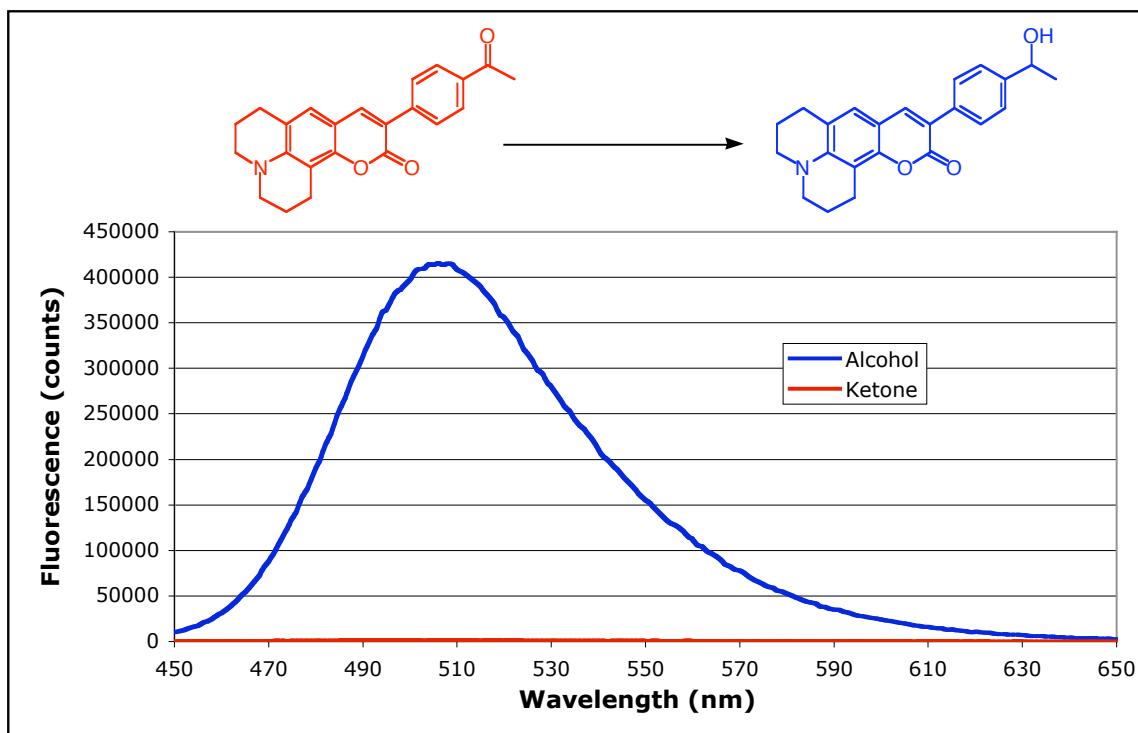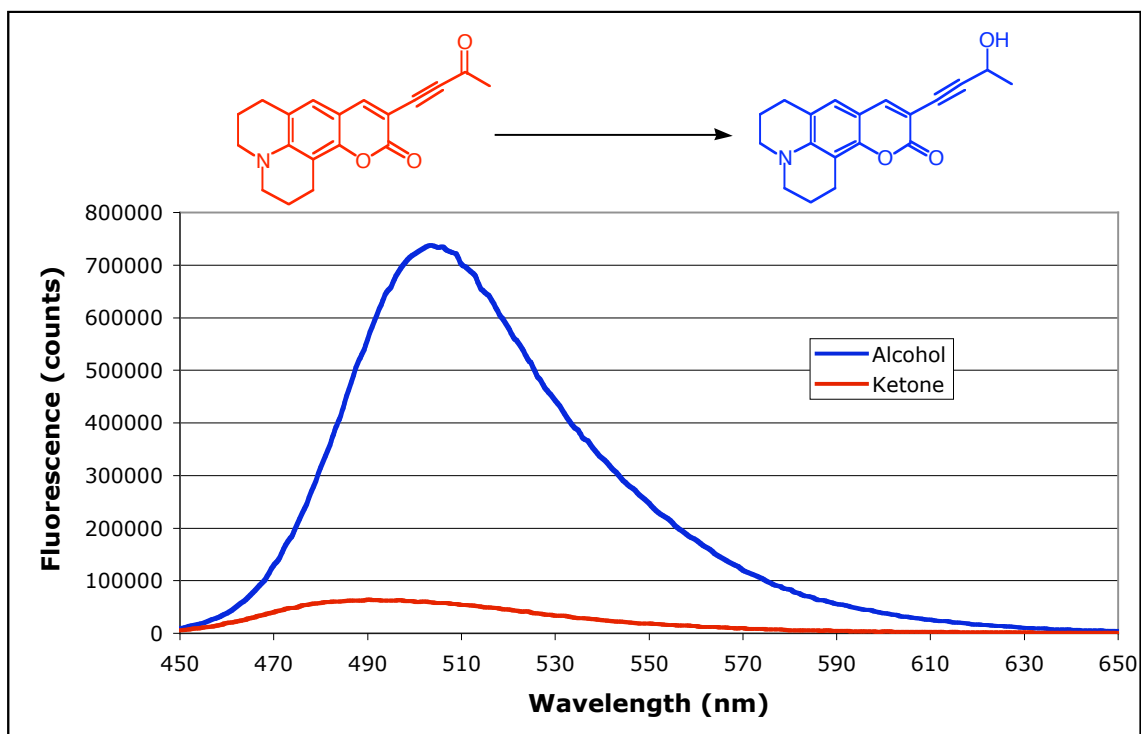

### Photochemical Characterization of All Synthesized Compounds:

| Ketone                                                                              | Abs. Max (nm) | Fluor. Max (nm) | Alcohol                                                                              | Abs. Max (nm) | Fluor. Max (nm) |
|-------------------------------------------------------------------------------------|---------------|-----------------|--------------------------------------------------------------------------------------|---------------|-----------------|
| 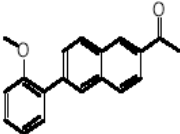   | 312           | 349             |    | 274           | 366             |
|    | 316           | 354             |    | 279           | 380             |
|    | 334           | 454             |    | 346           | 411#            |
|  | 360           | 410             |  | 295           | 404             |
|  | 346           | 392             |  | 318           | 474             |
|  | <b>368</b>    | <b>521</b>      |  | <b>348</b>    | <b>429</b>      |

|                                                                                     |            |            |                                                                                      |            |            |
|-------------------------------------------------------------------------------------|------------|------------|--------------------------------------------------------------------------------------|------------|------------|
| 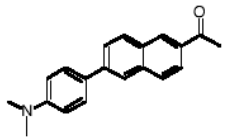   | 361        | -          |    | 316        | 498        |
|    | 396        | 416        |    | 347        | 512#       |
|    | 377        | 516        |    | 335        | 461        |
|    | 395        | -          |    | 318        | 453        |
|  | <b>389</b> | <b>448</b> |  | <b>361</b> | <b>440</b> |
|  | 364        | -          |  | 315        | 447        |

|                                                                                     |            |            |                                                                                      |            |             |
|-------------------------------------------------------------------------------------|------------|------------|--------------------------------------------------------------------------------------|------------|-------------|
| 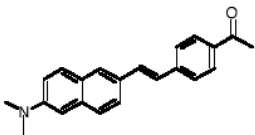   | <b>392</b> | <b>452</b> |    | <b>348</b> | <b>510#</b> |
|    | 378        | -          |    | 331        | -           |
|    | 333        | 668        |    | 329        | 461         |
|    | 359        | 429        |    | 320        | 400         |
|  | 322        | 443        |  | 278        | 455         |
|  | <b>368</b> | <b>416</b> |  | <b>346</b> | <b>420</b>  |

|                                                                                     |            |            |                                                                                      |            |            |
|-------------------------------------------------------------------------------------|------------|------------|--------------------------------------------------------------------------------------|------------|------------|
| 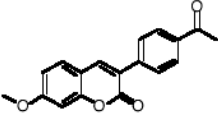   | <b>348</b> | <b>462</b> |    | <b>342</b> | <b>429</b> |
|    | 449        | 504        |    | 378        | 501*       |
|    | 465        | 587        |    | 416        | 519^       |
|    | <b>464</b> | <b>512</b> |    | <b>429</b> | <b>508</b> |
|  | <b>435</b> | <b>511</b> |  | <b>422</b> | <b>509</b> |
|  | <b>418</b> | <b>520</b> |  | <b>398</b> | <b>509</b> |

|                                                                                   |     |     |                                                                                    |     |      |
|-----------------------------------------------------------------------------------|-----|-----|------------------------------------------------------------------------------------|-----|------|
| 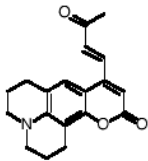 | -   | -   |  | 402 | 502# |
|  | 458 | 539 |  | 433 | 450^ |
|  | 410 | 474 |  | 405 | 550# |

# low quantum yield, ^ reactivity with cellular reductants, \* no change in wavelength of emission

## Protocols for Enzymatic Assays

### **Procedure for Enzymatic Screening of Selected Probes 1-7:**

Horse Liver alcohol dehydrogenase (Lot Number 51K7520), *Thermoanaerobium brockii* NADP<sup>+</sup> dependent alcohol dehydrogenase (Lot Number 033K4093), *Pseudomonas testosteroni* 3 $\beta$ -hydroxysteroid dehydrogenase (Lot Number 053K8624), and *Bacillus sphaericus* 12 $\beta$ -hydroxysteroid dehydrogenase (Lot Number 70K16621) were purchased from Sigma. Yeast alcohol dehydrogenase (Lot Number 93122920), glycerol dehydrogenase (Lot Number 92110122), (D)-lactate dehydrogenase (Lot Number 92419236), (L)-lactate dehydrogenase (Lot Number 92801821), NAD<sup>+</sup>, NADP<sup>+</sup>, NADH, and NADPH were purchased from Roche. Enzyme activity was confirmed by compliance to supplier's quality control assays prior to usage. Rat and human 3 $\beta$ -hydroxysteroid dehydrogenases were provided by Professor Trevor Penning (University of Pennsylvania School of Medicine) and human amyloid- $\beta$  peptide binding alcohol dehydrogenase was supplied by Professor Shi Du Yan (Columbia University School for Physicians and Surgeons).

Enzymatic assays were performed in triplicate on selected fluorogenic substrates according to the following protocol. To each well of a FALCON 96-well black flat bottom plate was added (1) 40  $\mu$ L of 500 mM potassium phosphate buffer pH 7.0, (2) 113  $\mu$ L of double deionized water, (3) 25  $\mu$ L of 2 mM NADH (except for *Pseudomonas testosteroni* 3 $\beta$ -hydroxysteroid dehydrogenase, rat 3 $\beta$ -hydroxysteroid dehydrogenase, and *Thermoanaerobium brockii* NADP<sup>+</sup> dependent alcohol dehydrogenase, in which cases 2 mM of NADPH was used), (4) 2  $\mu$ L of a 3-5 mM solution of substrate in DMSO, and (5) 20  $\mu$ L of a 40-50  $\mu$ g/mL solution of enzyme. Reaction volumes were mixed thoroughly after addition of cofactor, substrate, and enzyme and allowed to react 12 hours at 25°C. Scanning of the 96-well plate was performed by the MicroMax 384 connected to a Jobin Yvon Fluorolog through F-3000 fiber optic cables.

### **Determination of Kinetic Parameters for AKR1C3**

Fluorogenic substrate **5** reduction was monitored on a Hitachi F-4500 fluorimeter in Starna quartz cuvettes fluorometrically in 1 mL systems containing 100 mM potassium phosphate pH 6.0 containing excess of NADPH cofactor (250  $\mu$ M) and various amounts of the substrate (0.1953-50  $\mu$ M) dissolved in 4% acetonitrile. Aqueous assay components were added first, followed by addition of 20  $\mu$ L of acetonitrile as a cosolvent, and then addition of 20  $\mu$ L of the substrate in acetonitrile (total acetonitrile in the assay did not exceed 4%). Cuvettes were mixed thoroughly after addition of cofactor, cosolvent, and substrate. Reactions were initiated by the addition of 4  $\mu$ L of dilute AKR1C3 (115  $\mu$ g/mL) and were corrected for nonenzymatic rates. All reactions were followed by monitoring the increase in fluorescence of the product alcohol for 5 minutes at  $\lambda_{em}$  510 nm with  $\lambda_{ex}$  440 nm (Excitation and emission band pass slits both at 2.5 nm, lamp 900 V) at 37°C. The initial velocities, expressed in units of nanomoles per minute, were calculated according to previously published procedures<sup>7</sup>:

$$\text{initial rate} = [n_{st} \times (F_t - F_0) / (F_{st})] / t \quad (1)$$

where  $F_t$  and  $F_0$  represent the fluorescence at time  $t$  and  $0$ ,  $n_{st}$  is the nanomoles of the product standard, and  $F_{st}$  is the fluorescence resulting from  $n_{st}$  of product. Kinetic constants were approximated using the GraFit (Erithacus Software, Surrey, UK) non-linear regression analysis program to fit the untransformed data to a hyperbolic function as originally described<sup>9</sup>, yielding estimated values of  $k_{cat}$ ,  $K_m$ , and their associated standard errors.

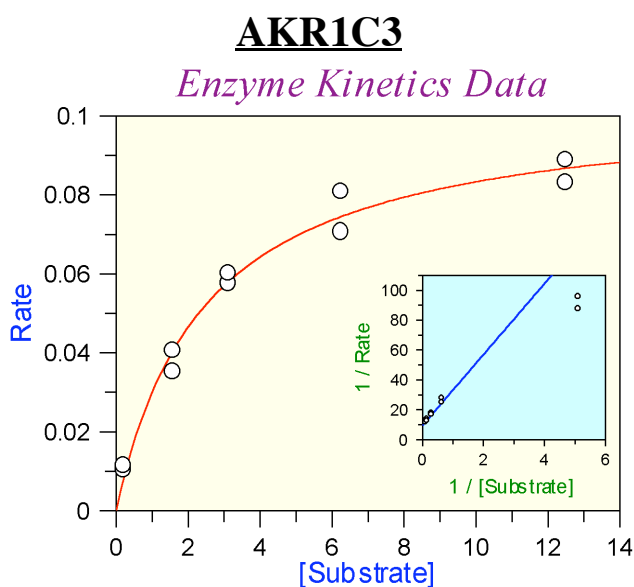

| Parameter      | Value  | □ | Std. Error                           |
|----------------|--------|---|--------------------------------------|
| Vmax           | 0.1039 |   | 0.0049 nmol/min                      |
| Km             | 2.4637 | □ | 0.3511 uM                            |
| kcat           | 8.244  |   | 0.389 min <sup>-1</sup>              |
| kcat/Km        | 335    |   | min <sup>-1</sup> / mM <sup>-1</sup> |
| Spec. activity | 0.226  |   | 0.011 umol/min/mg                    |

AKR1C3 kinetic data was also performed by HPLC separation of the fluorogenic substrate and its product alcohol and measurement of ketone to alcohol ratios. This data was found to correlate well with kinetic parameters determined fluorometrically<sup>10</sup>.



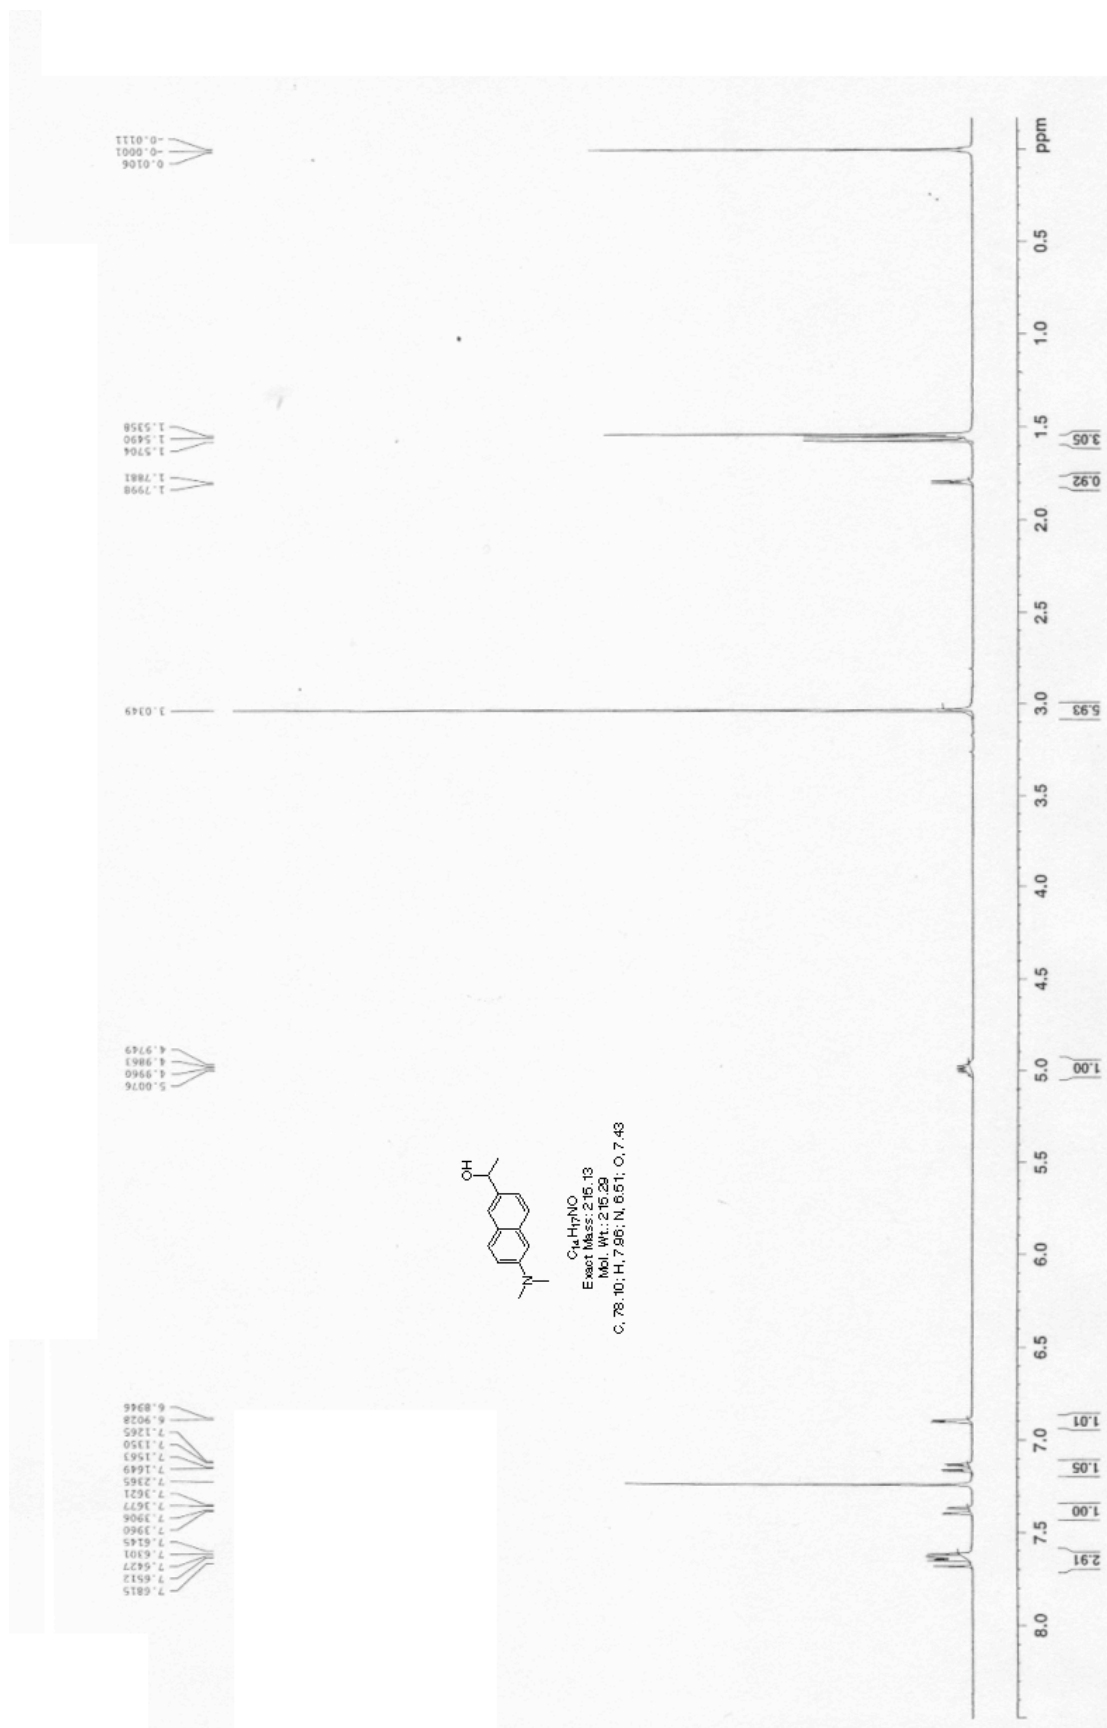

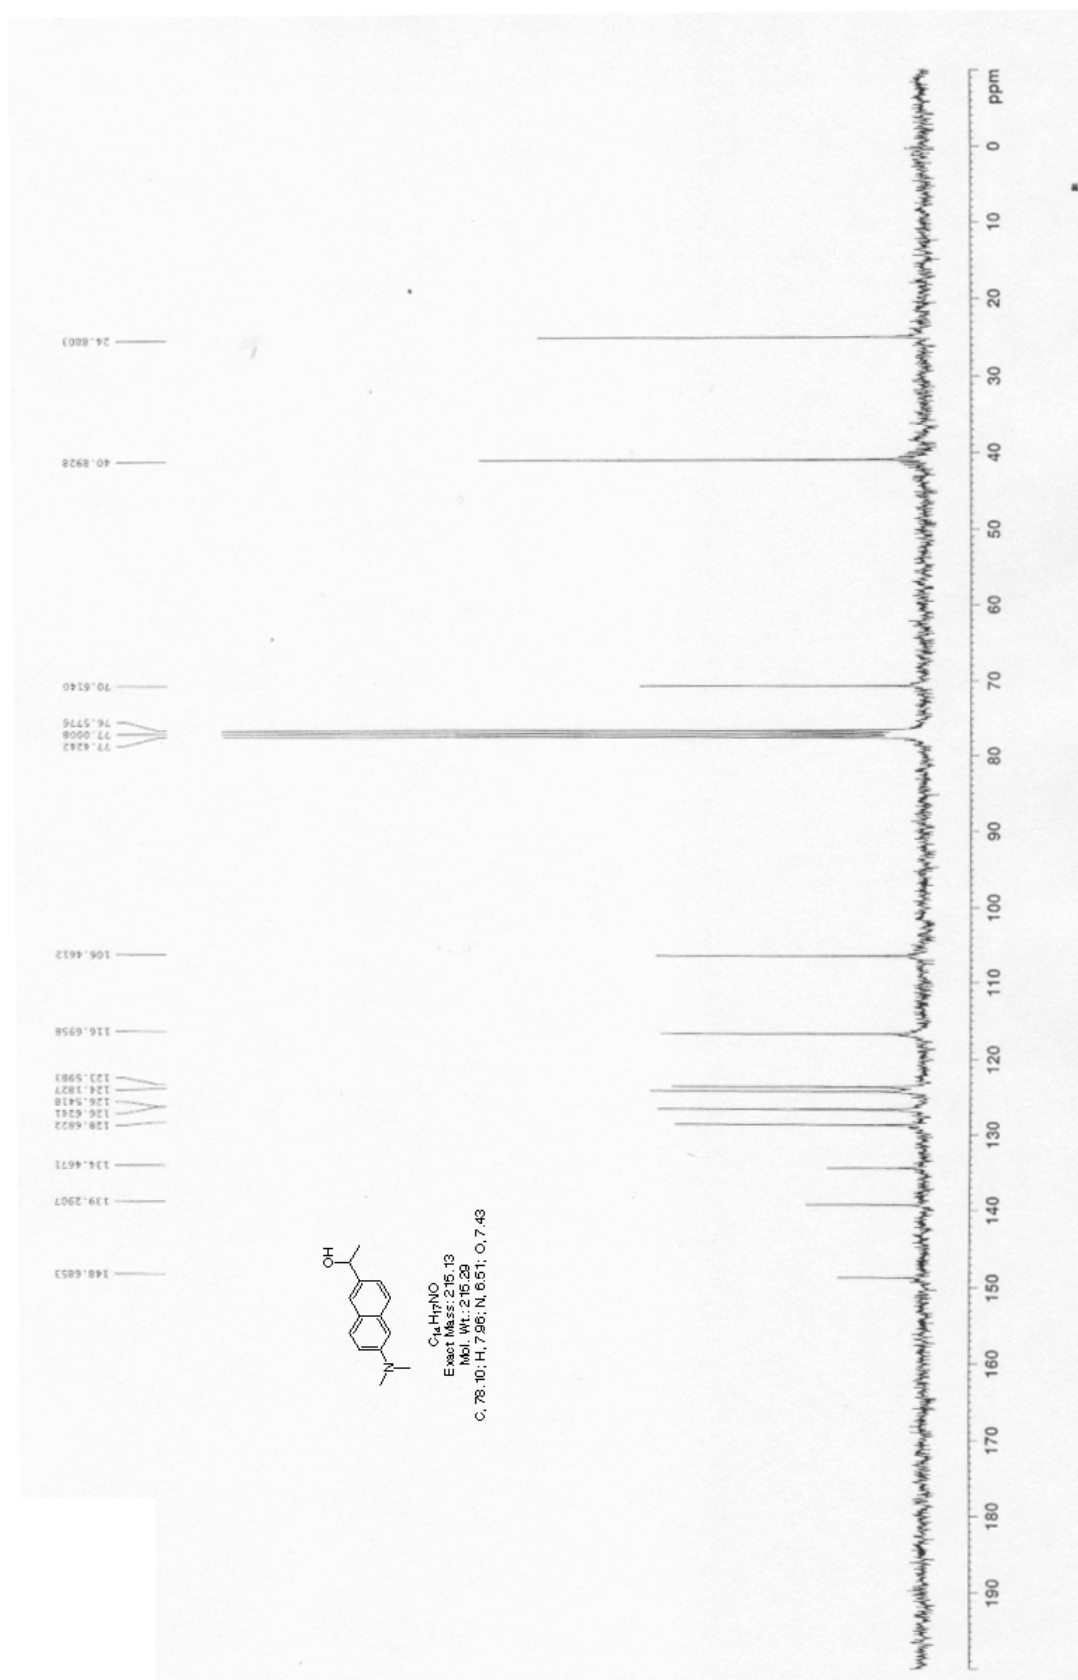

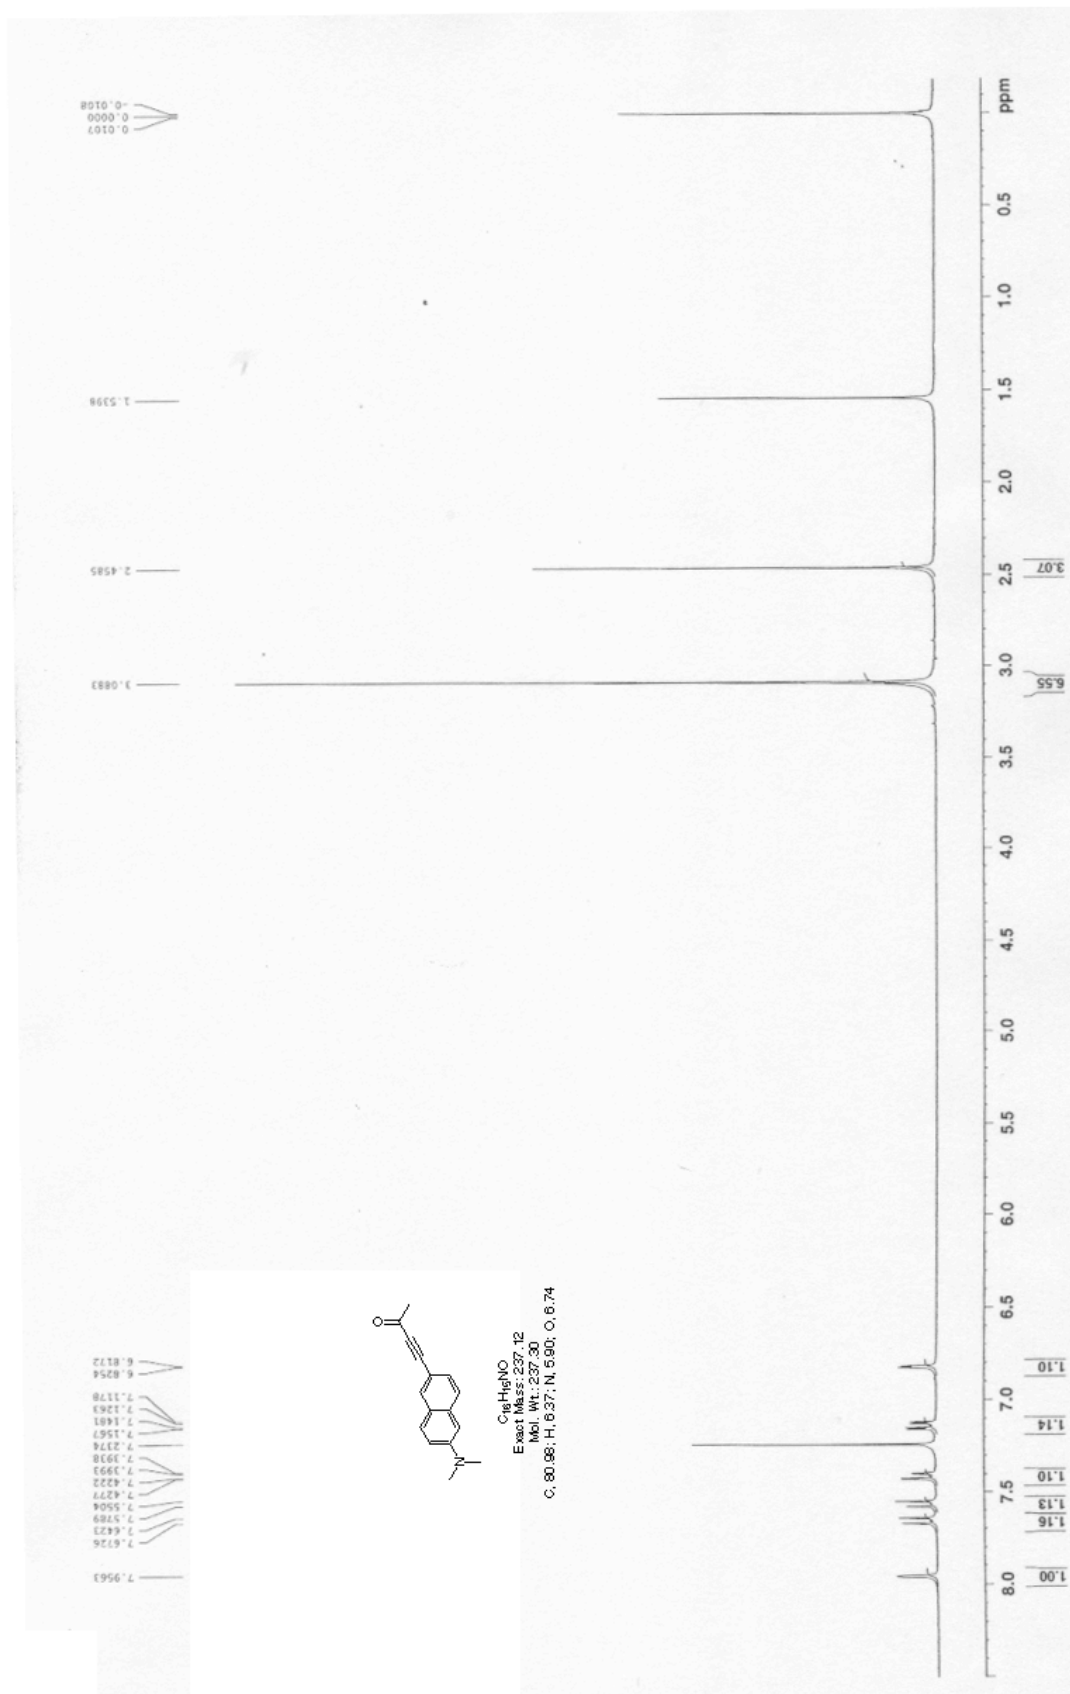

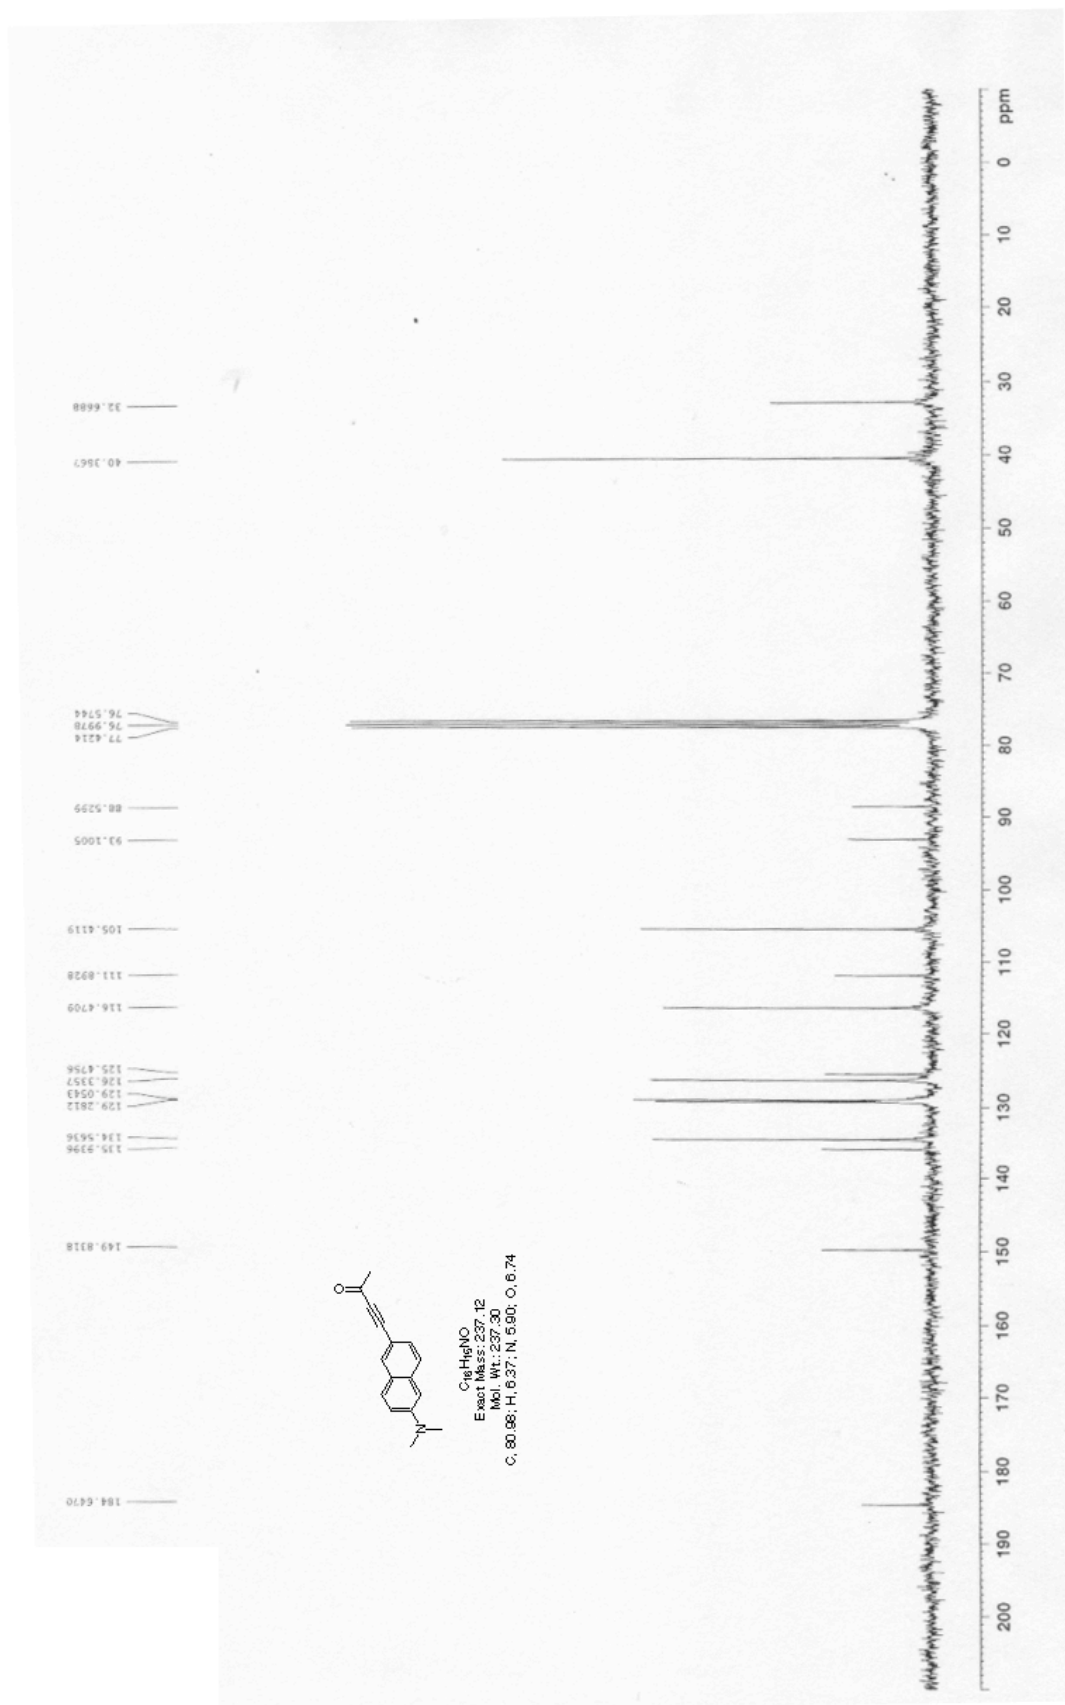

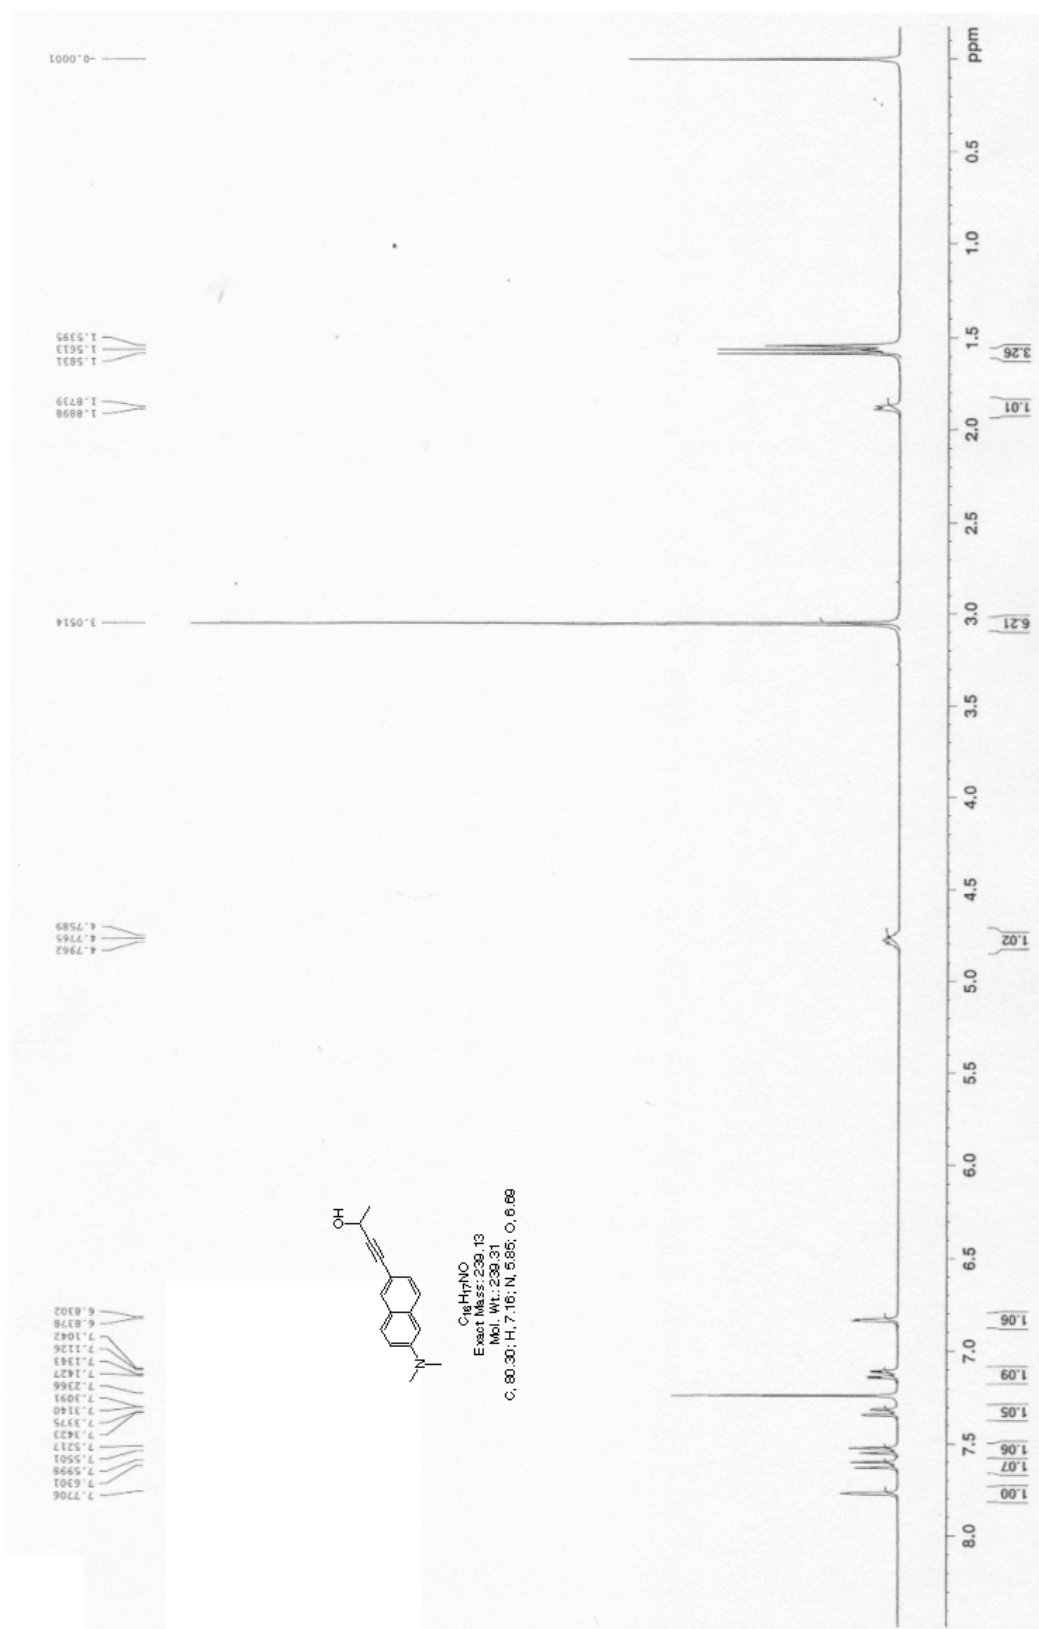

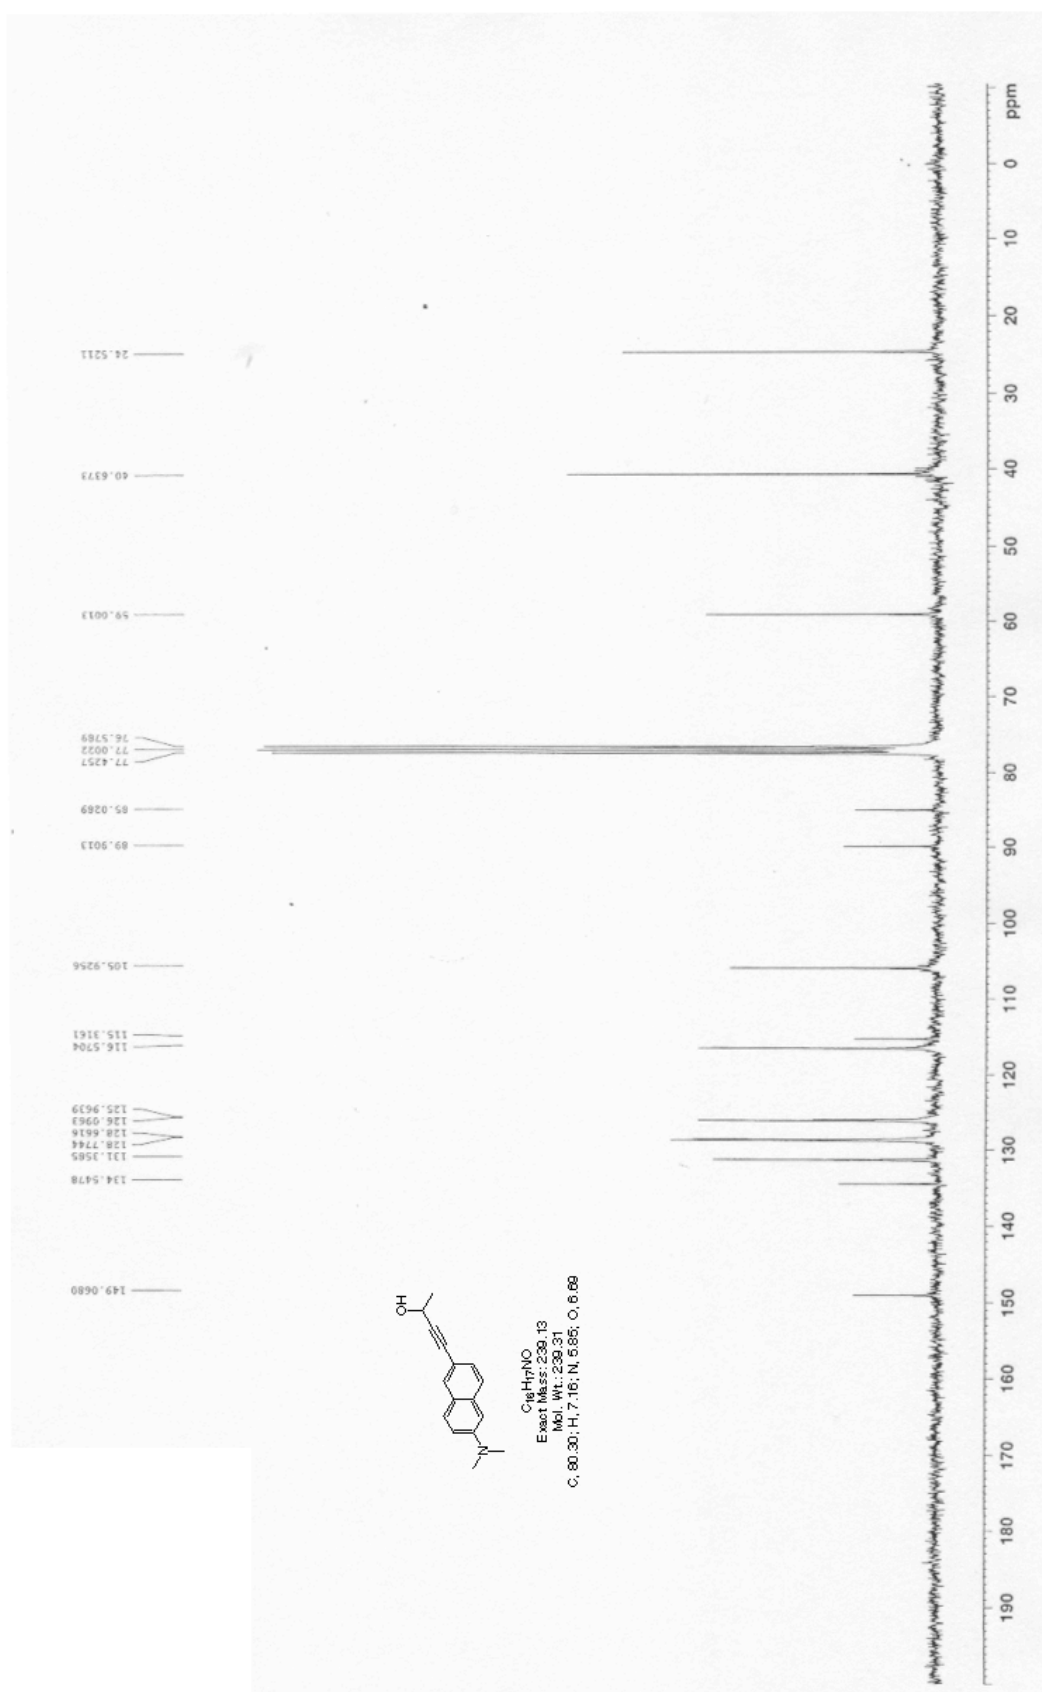



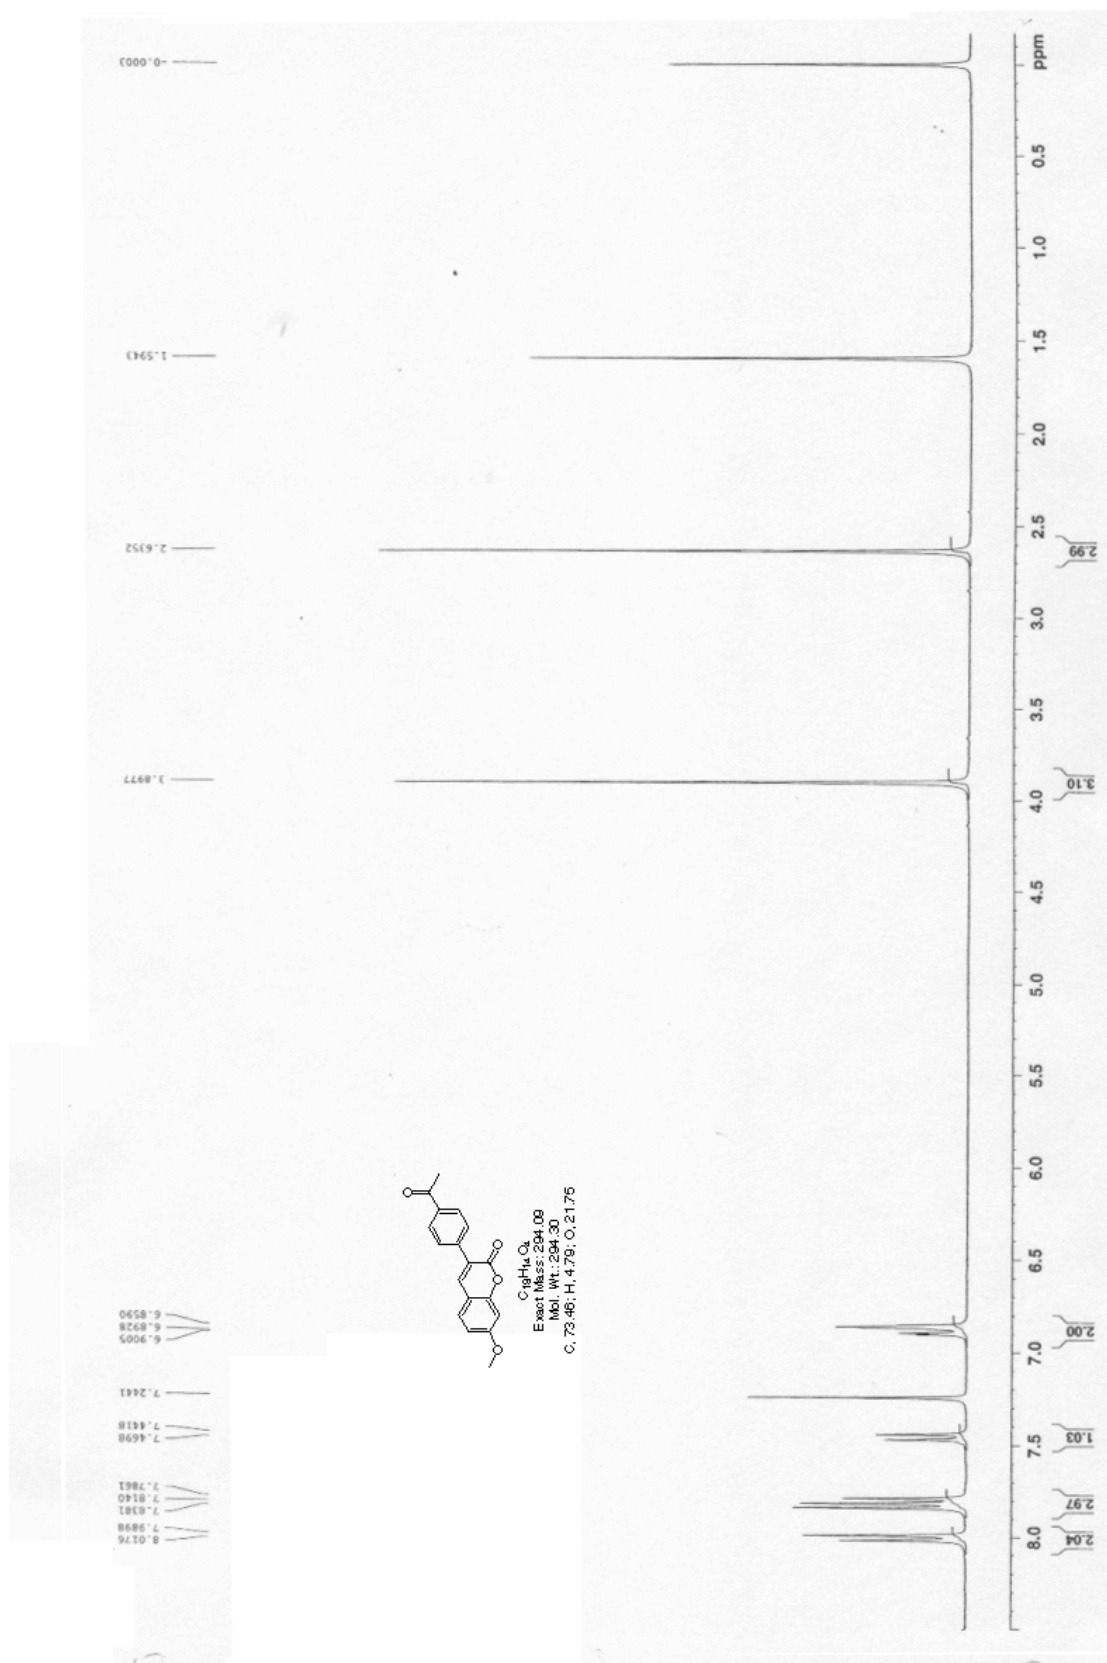

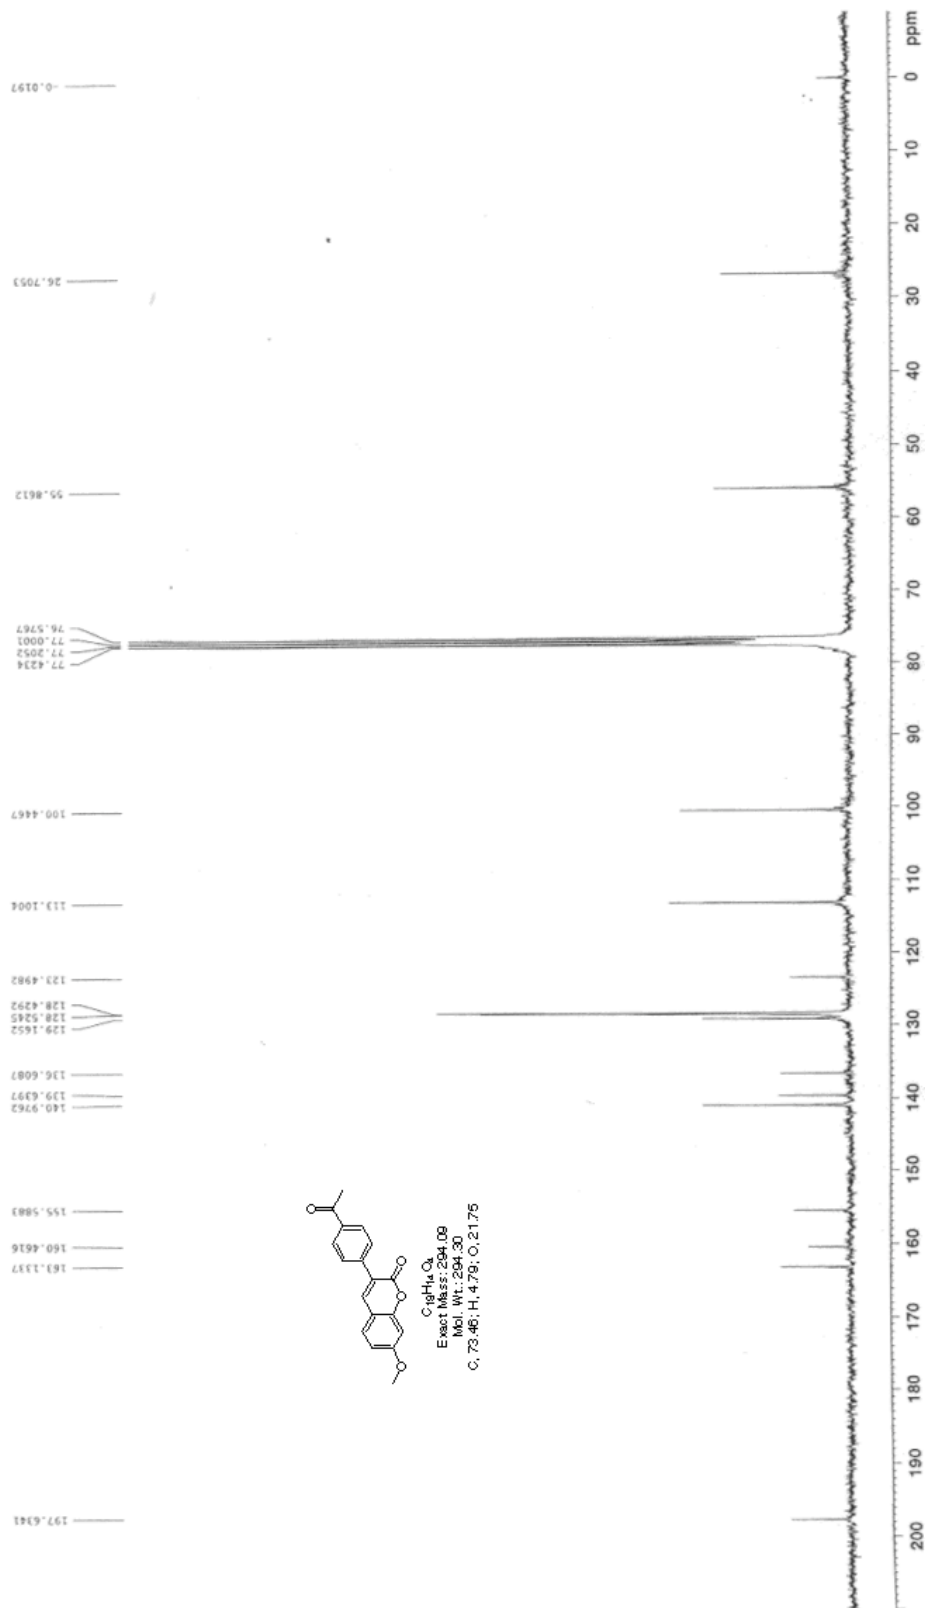



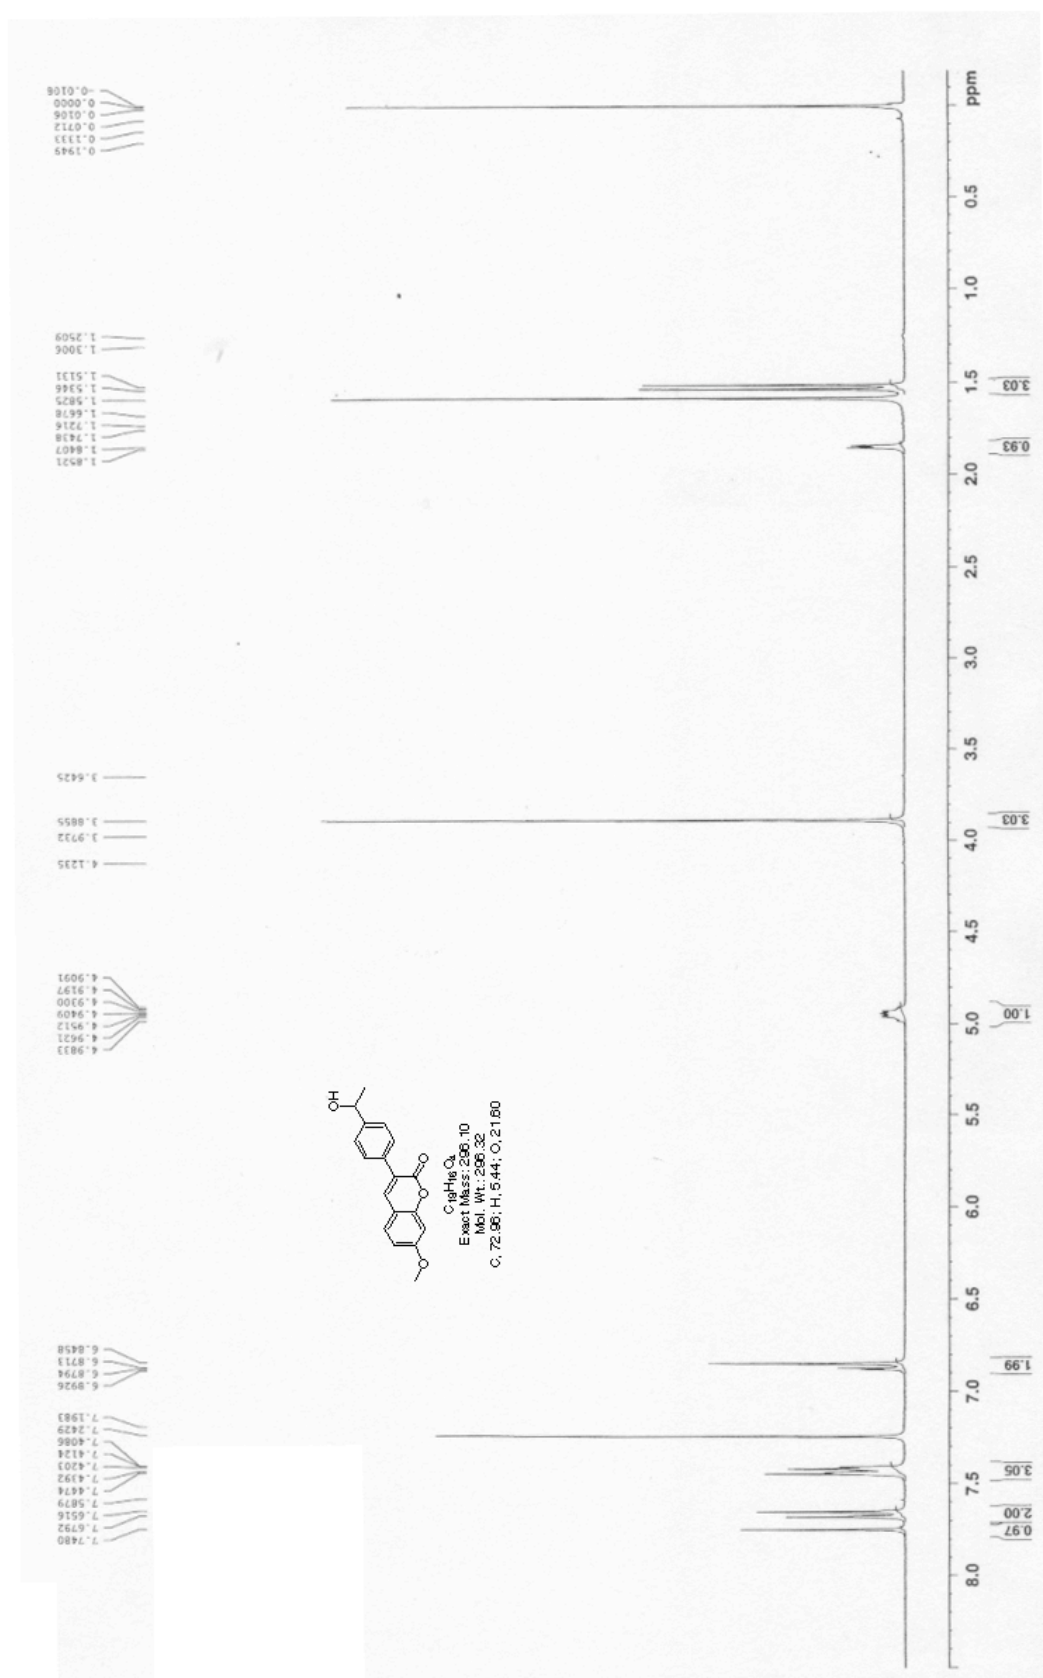

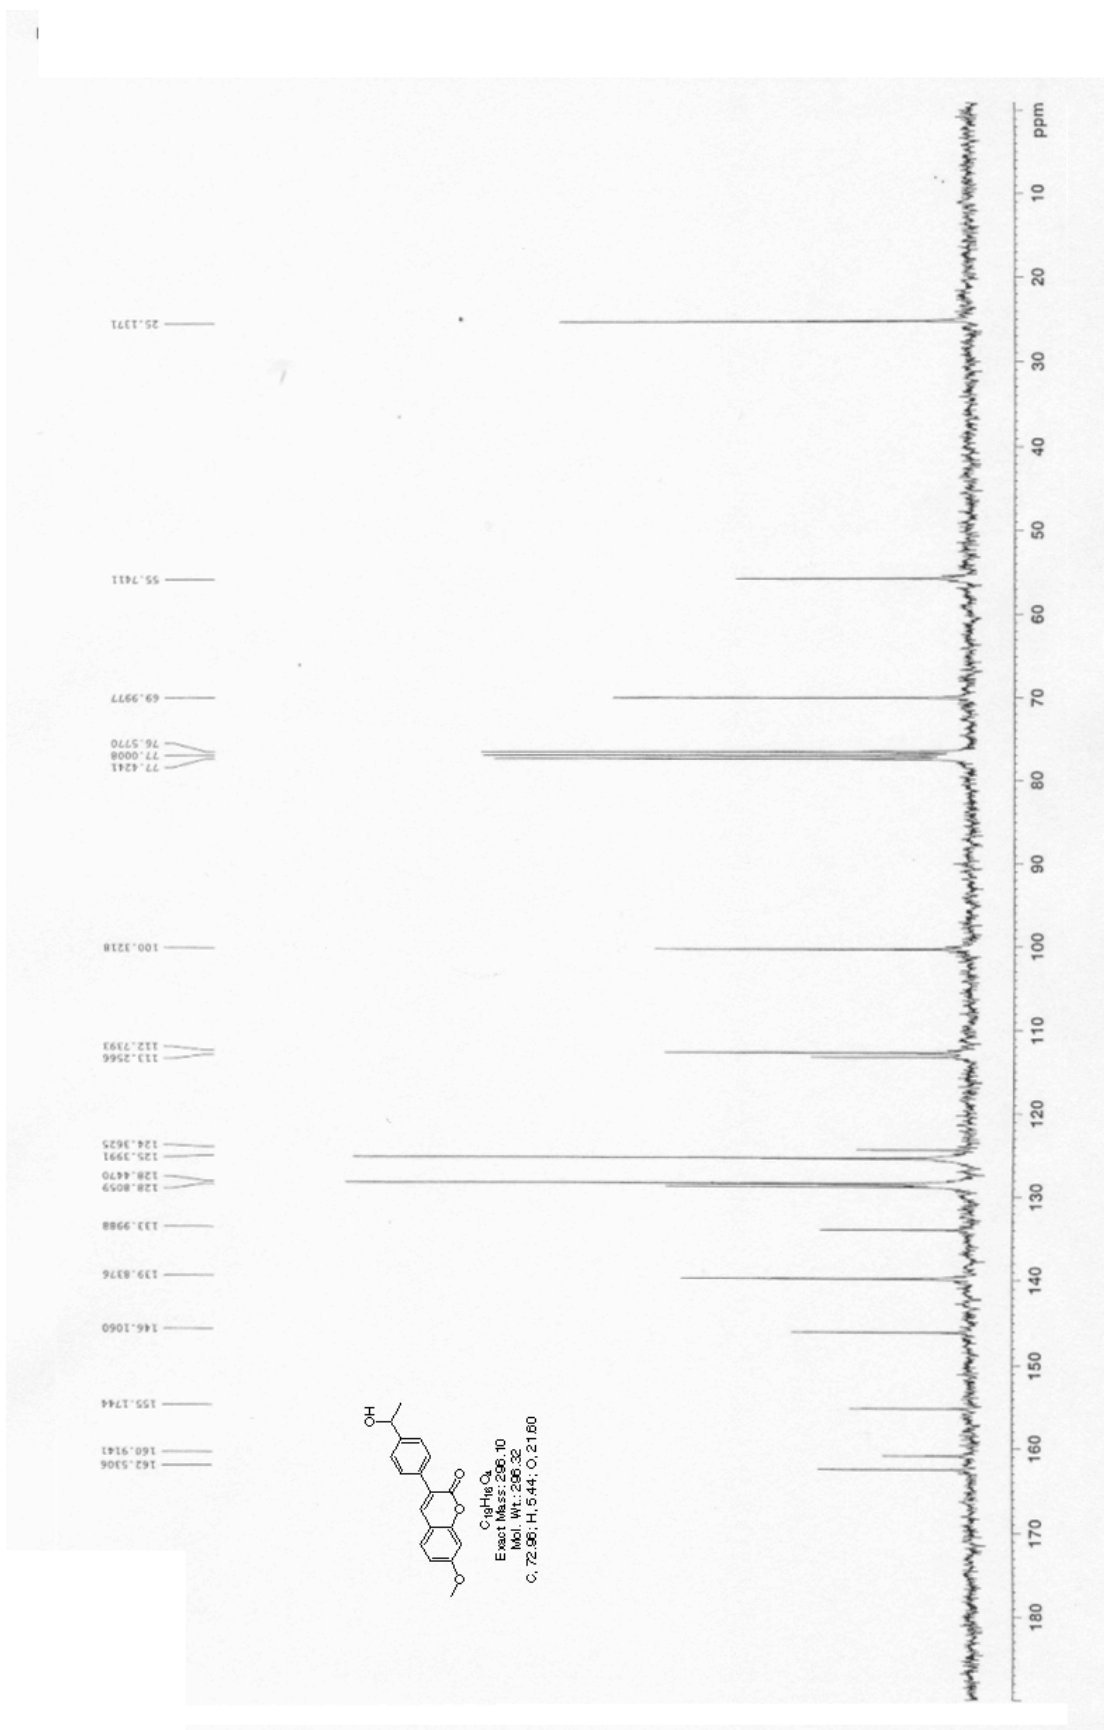

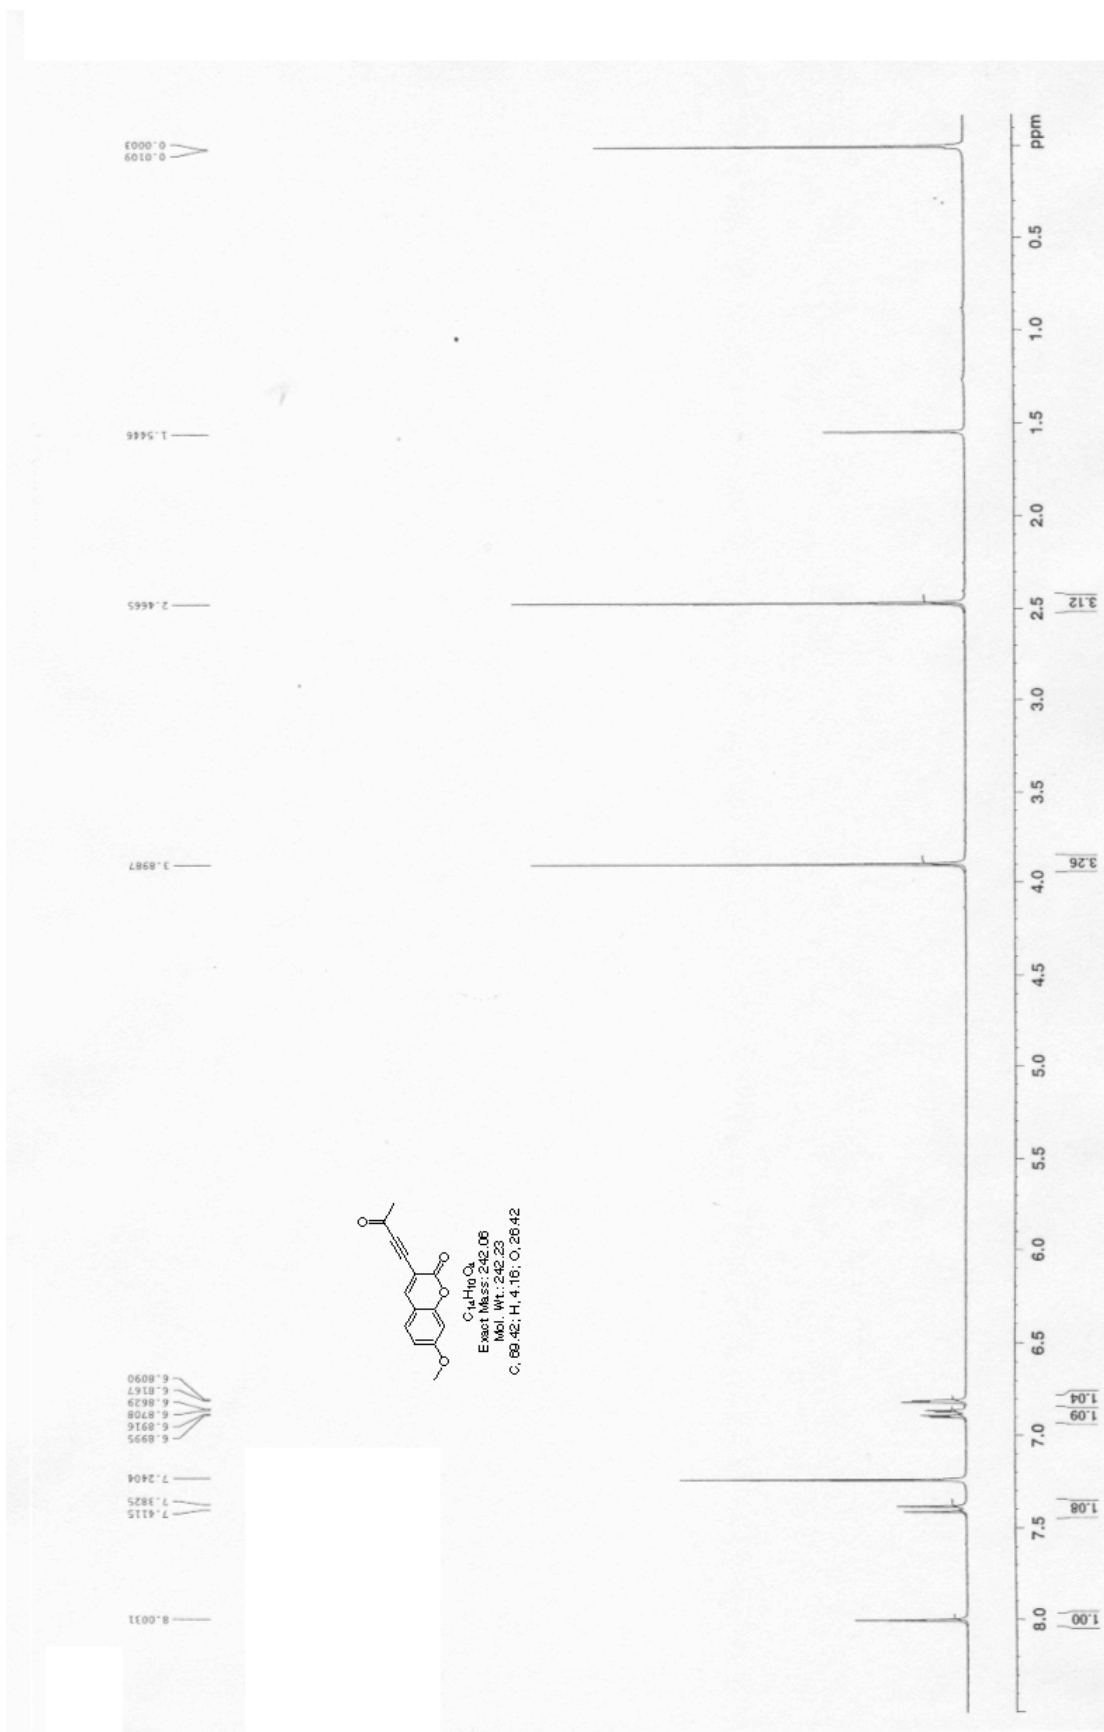

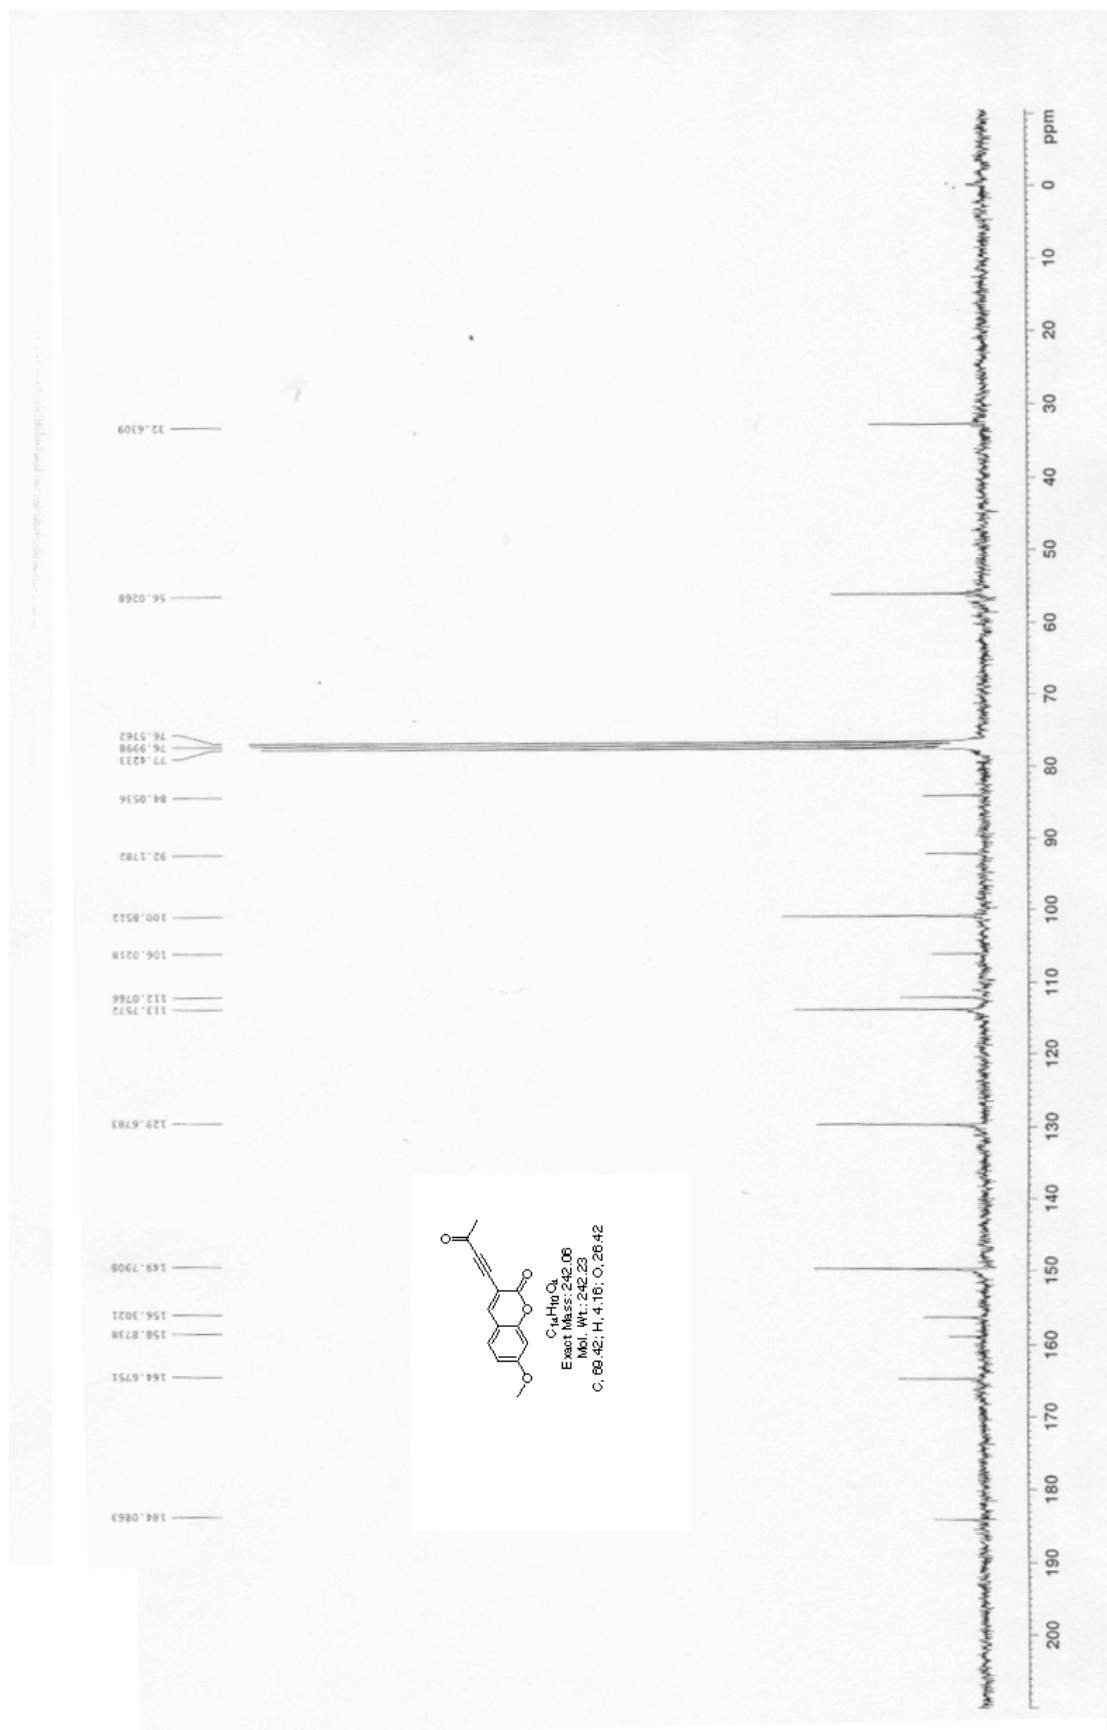

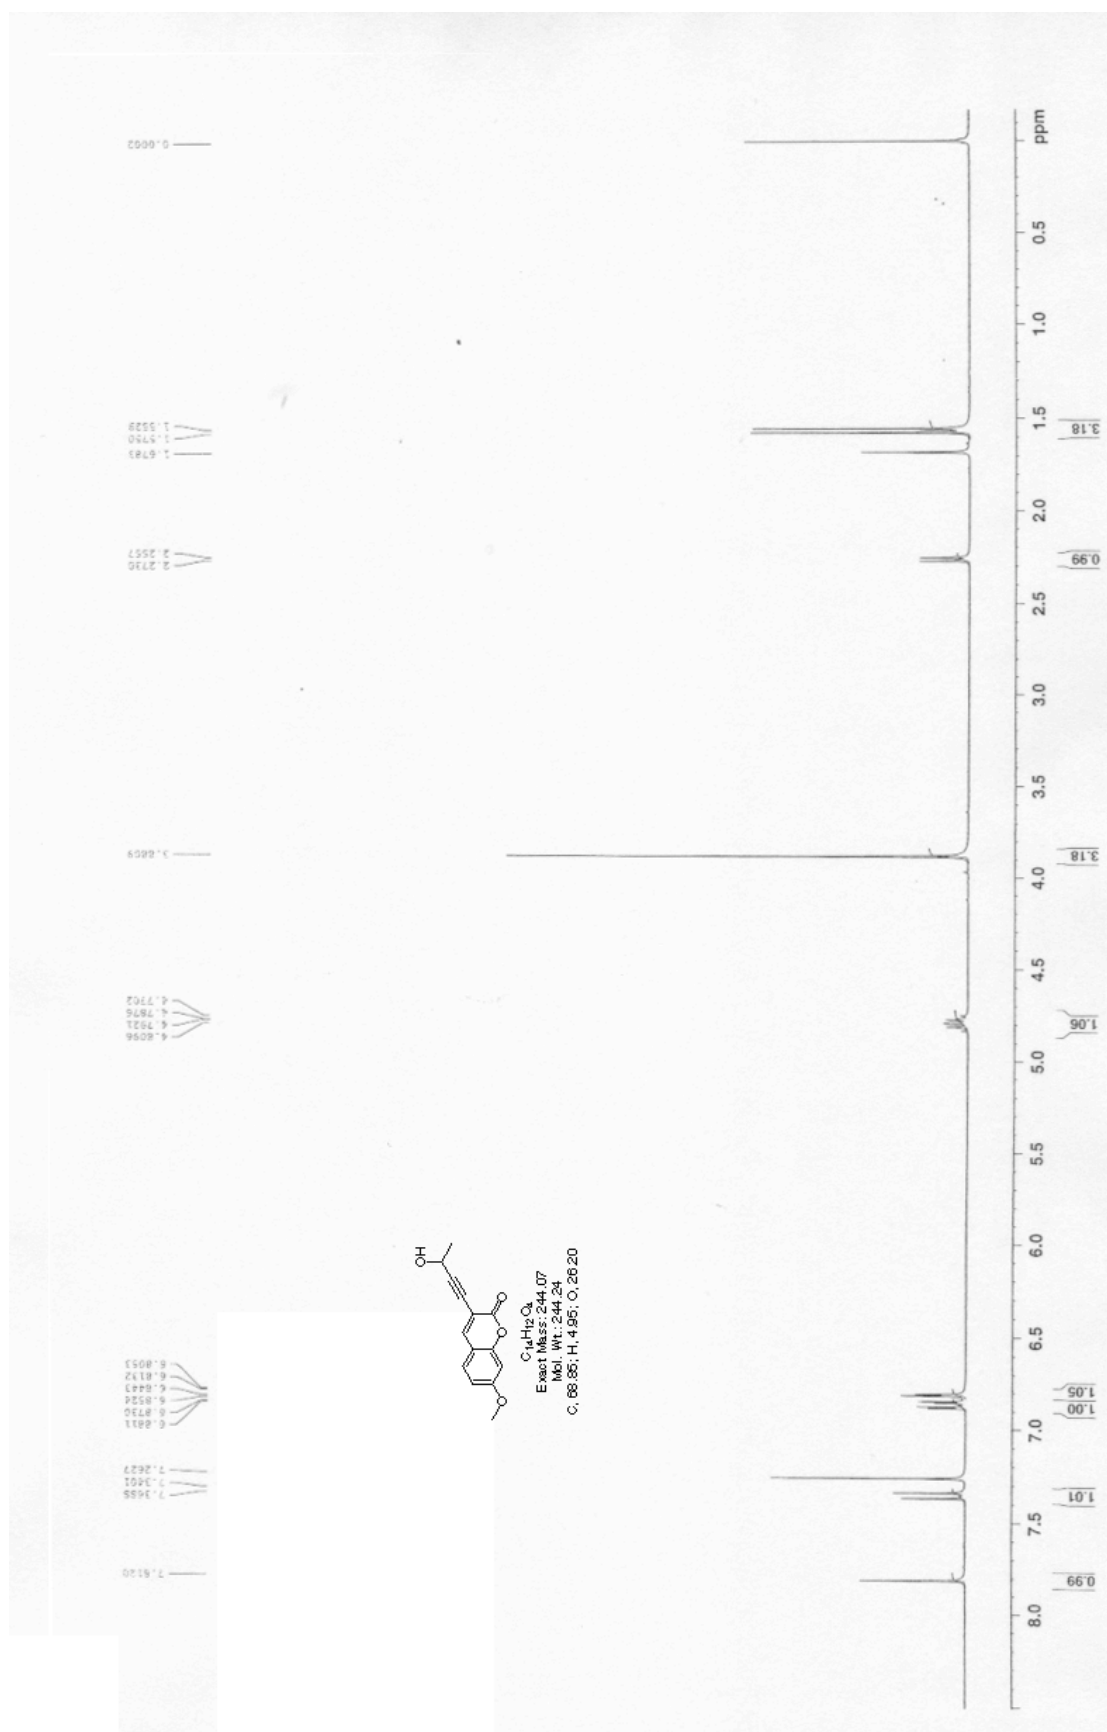

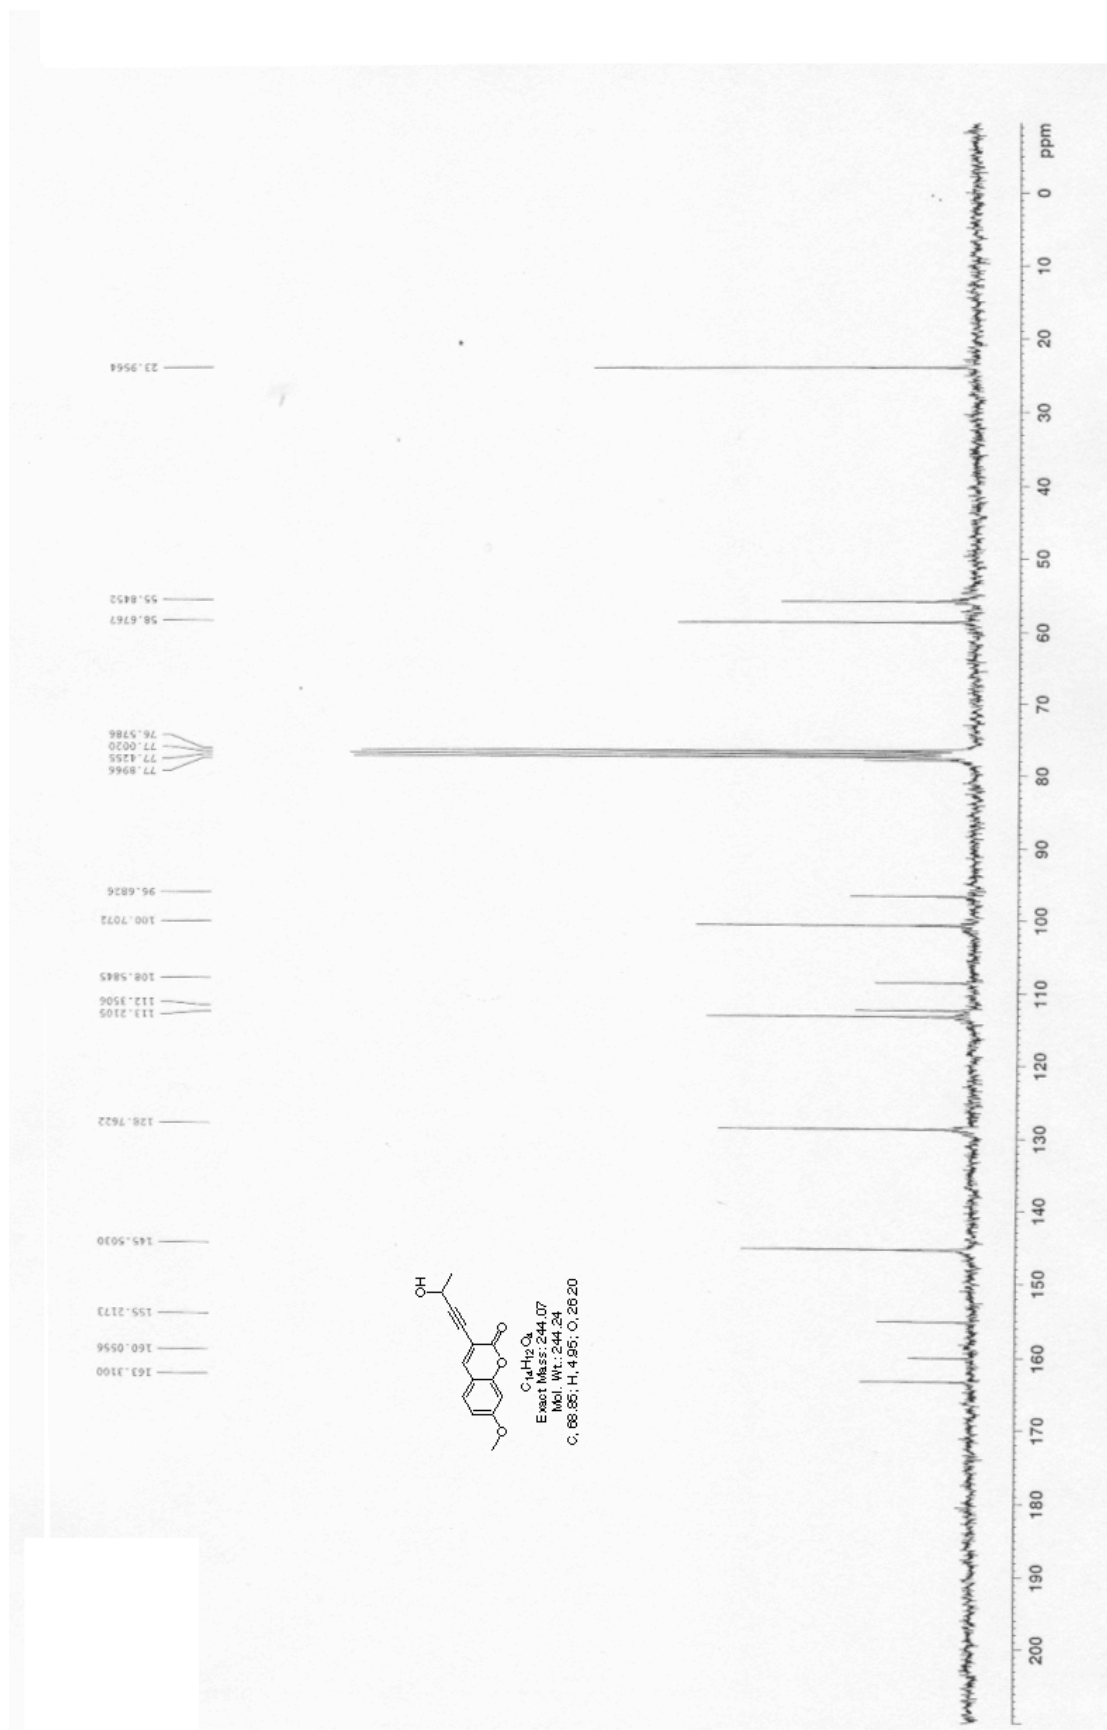



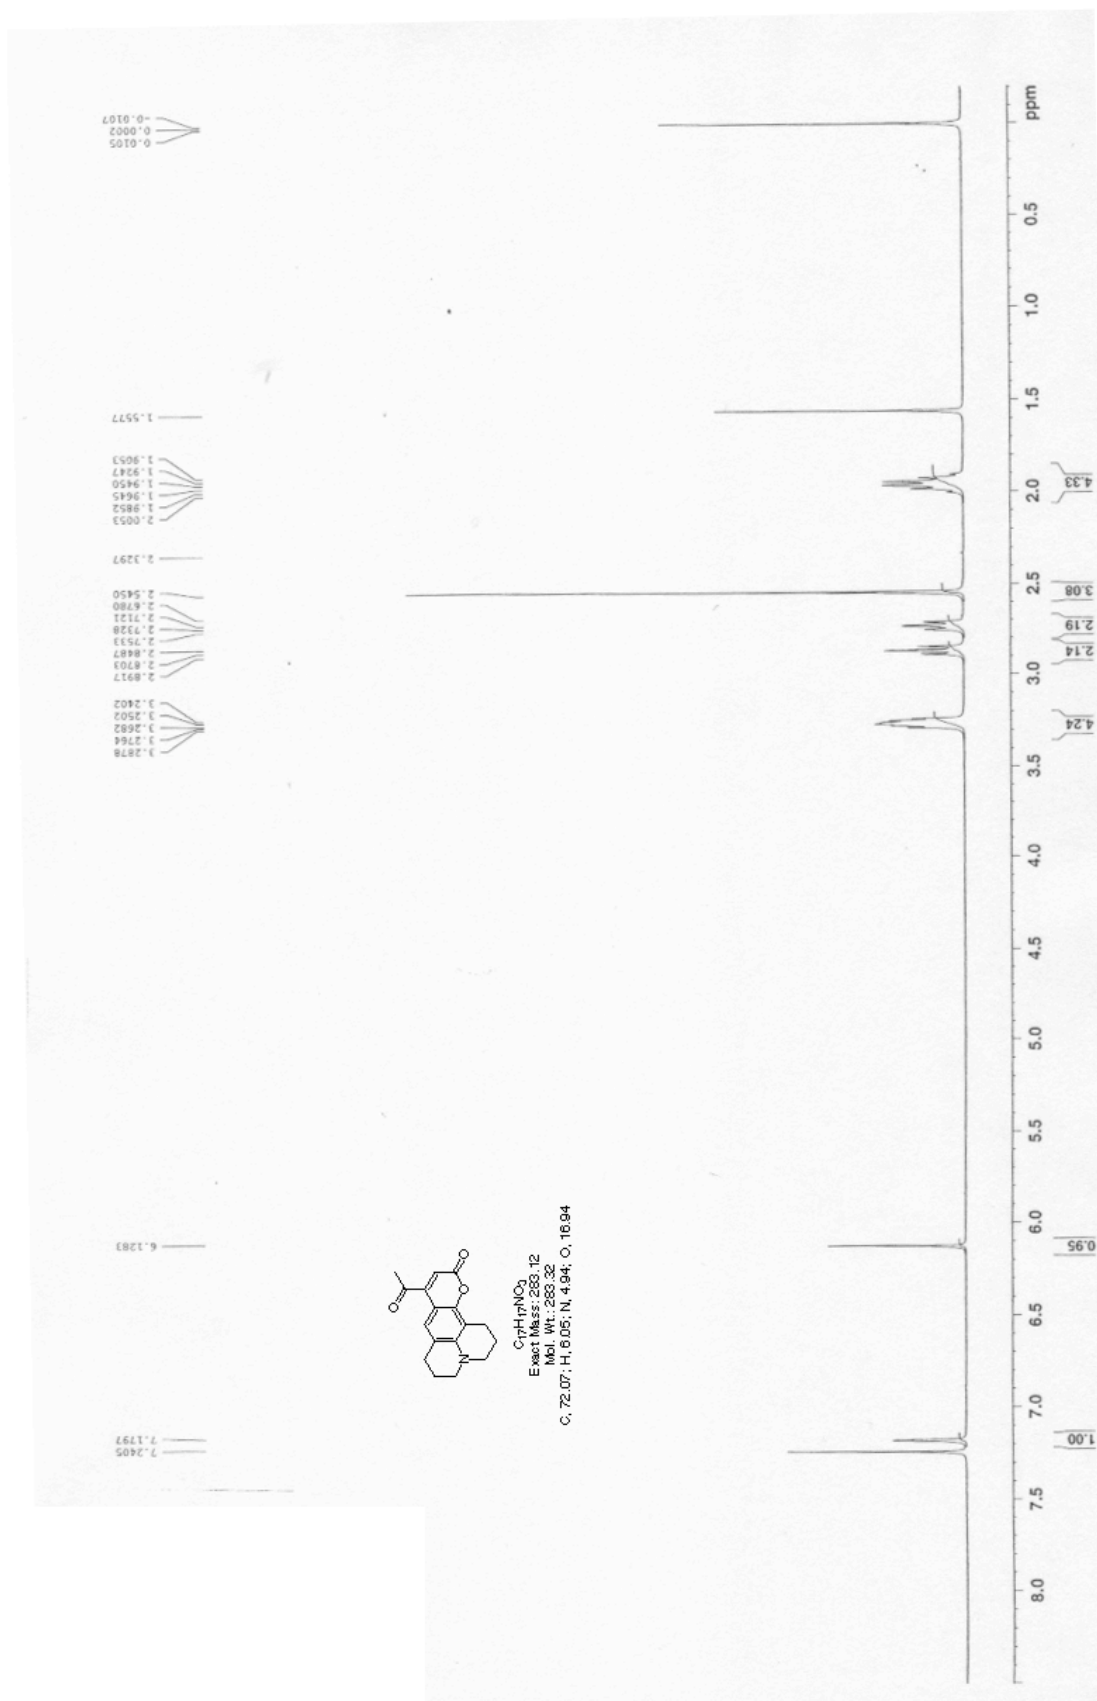

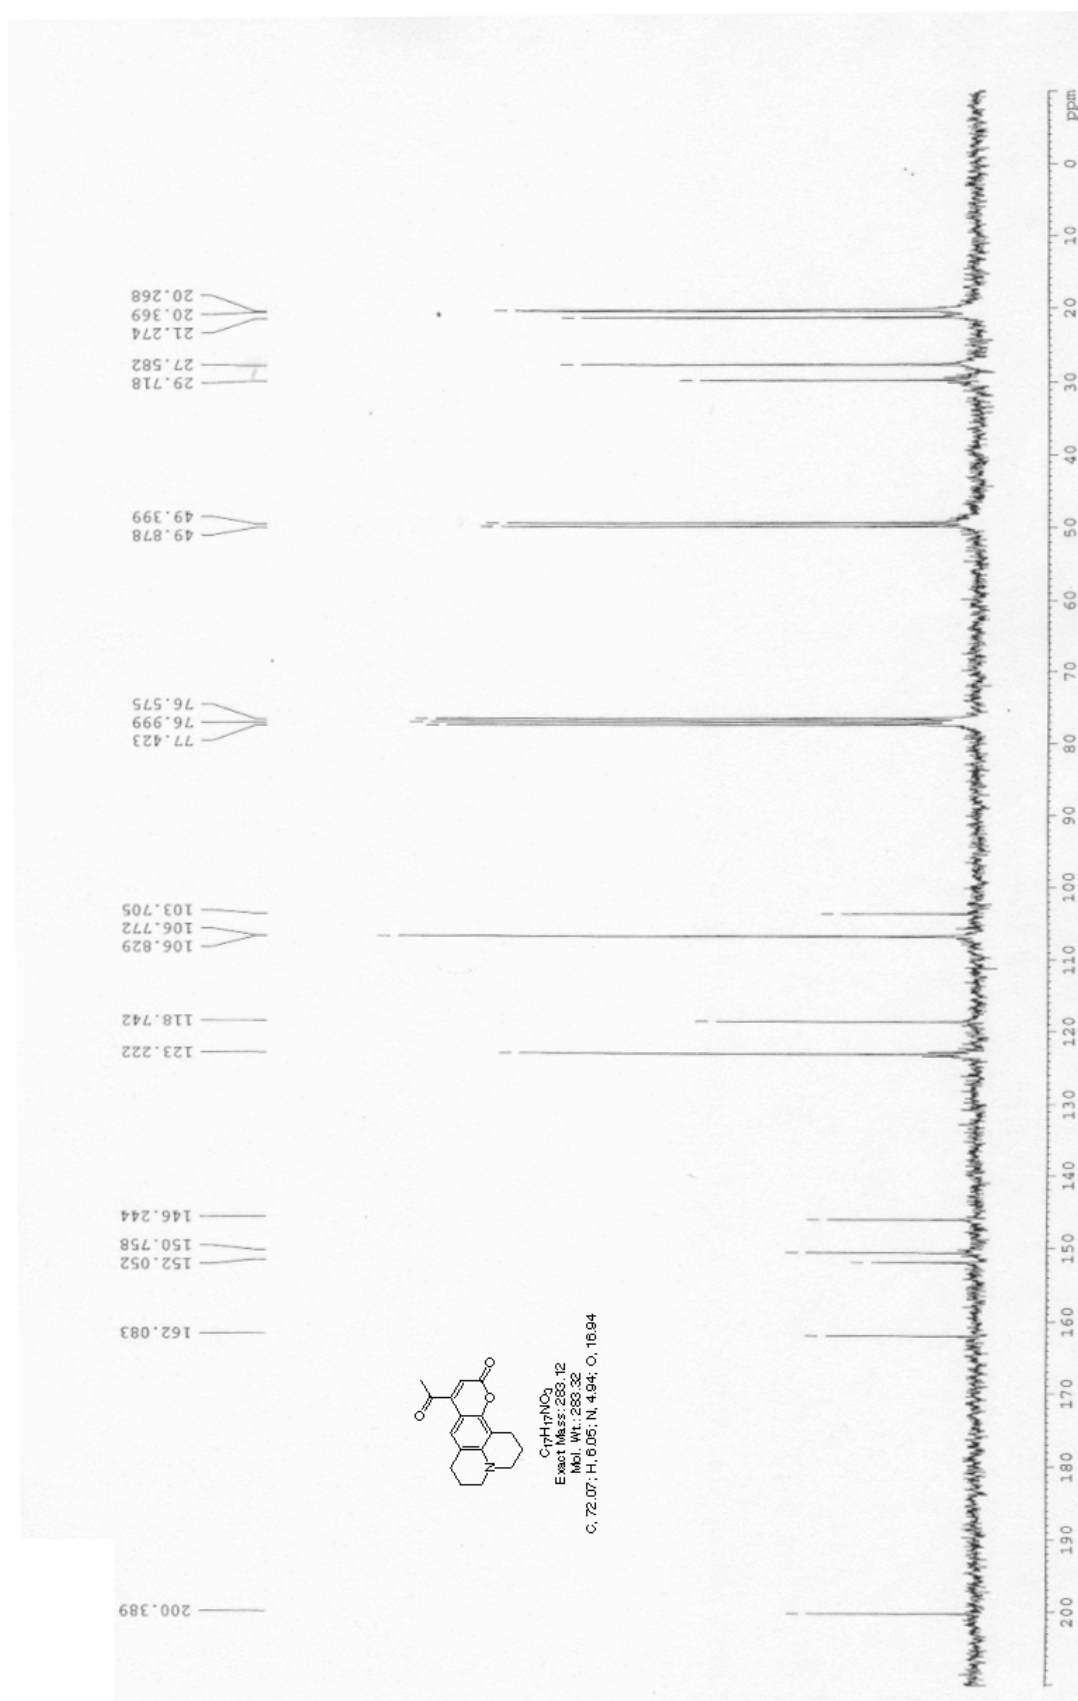



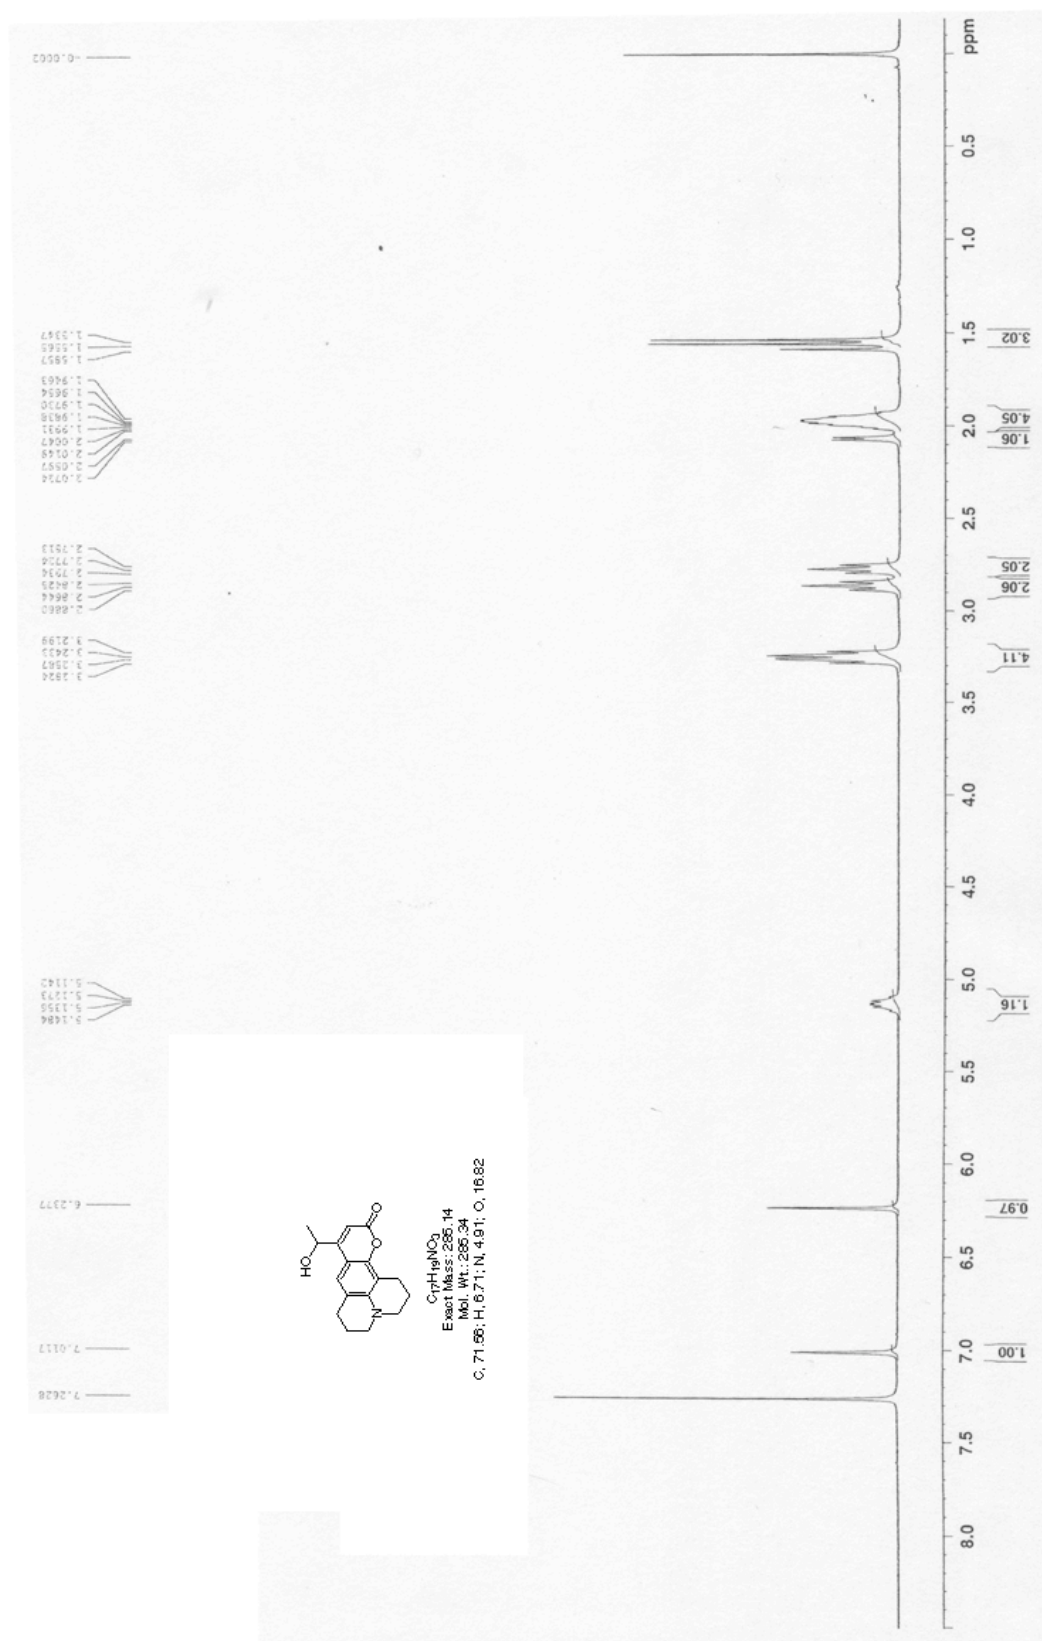

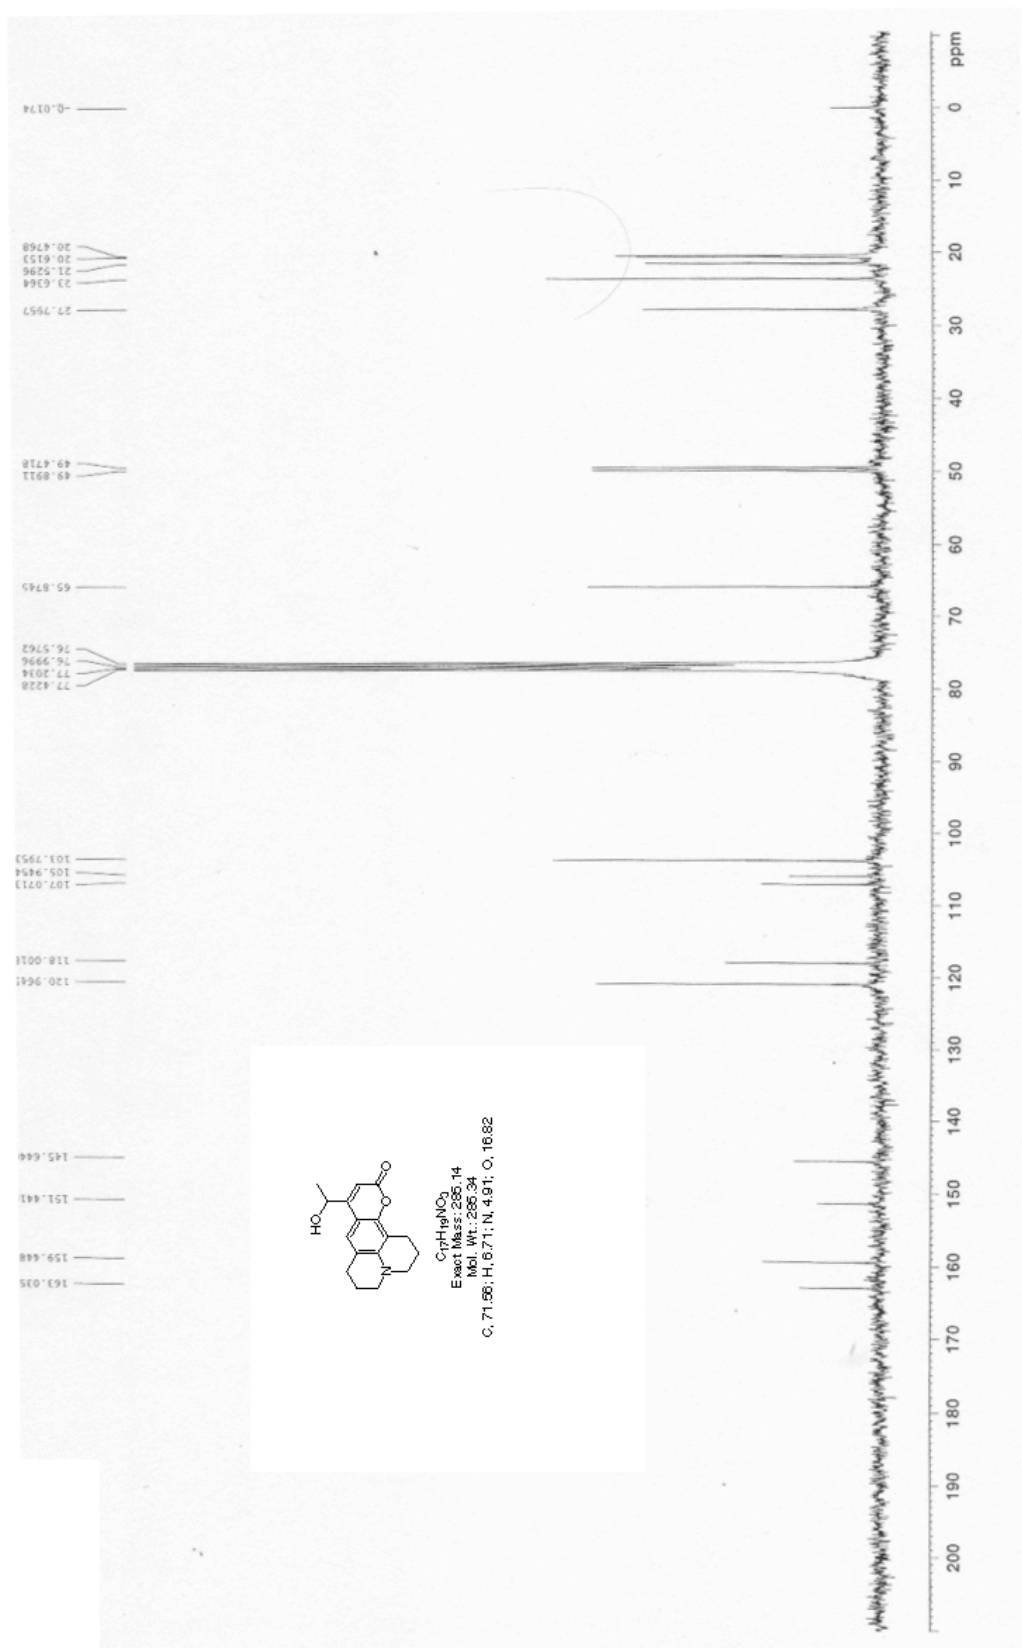

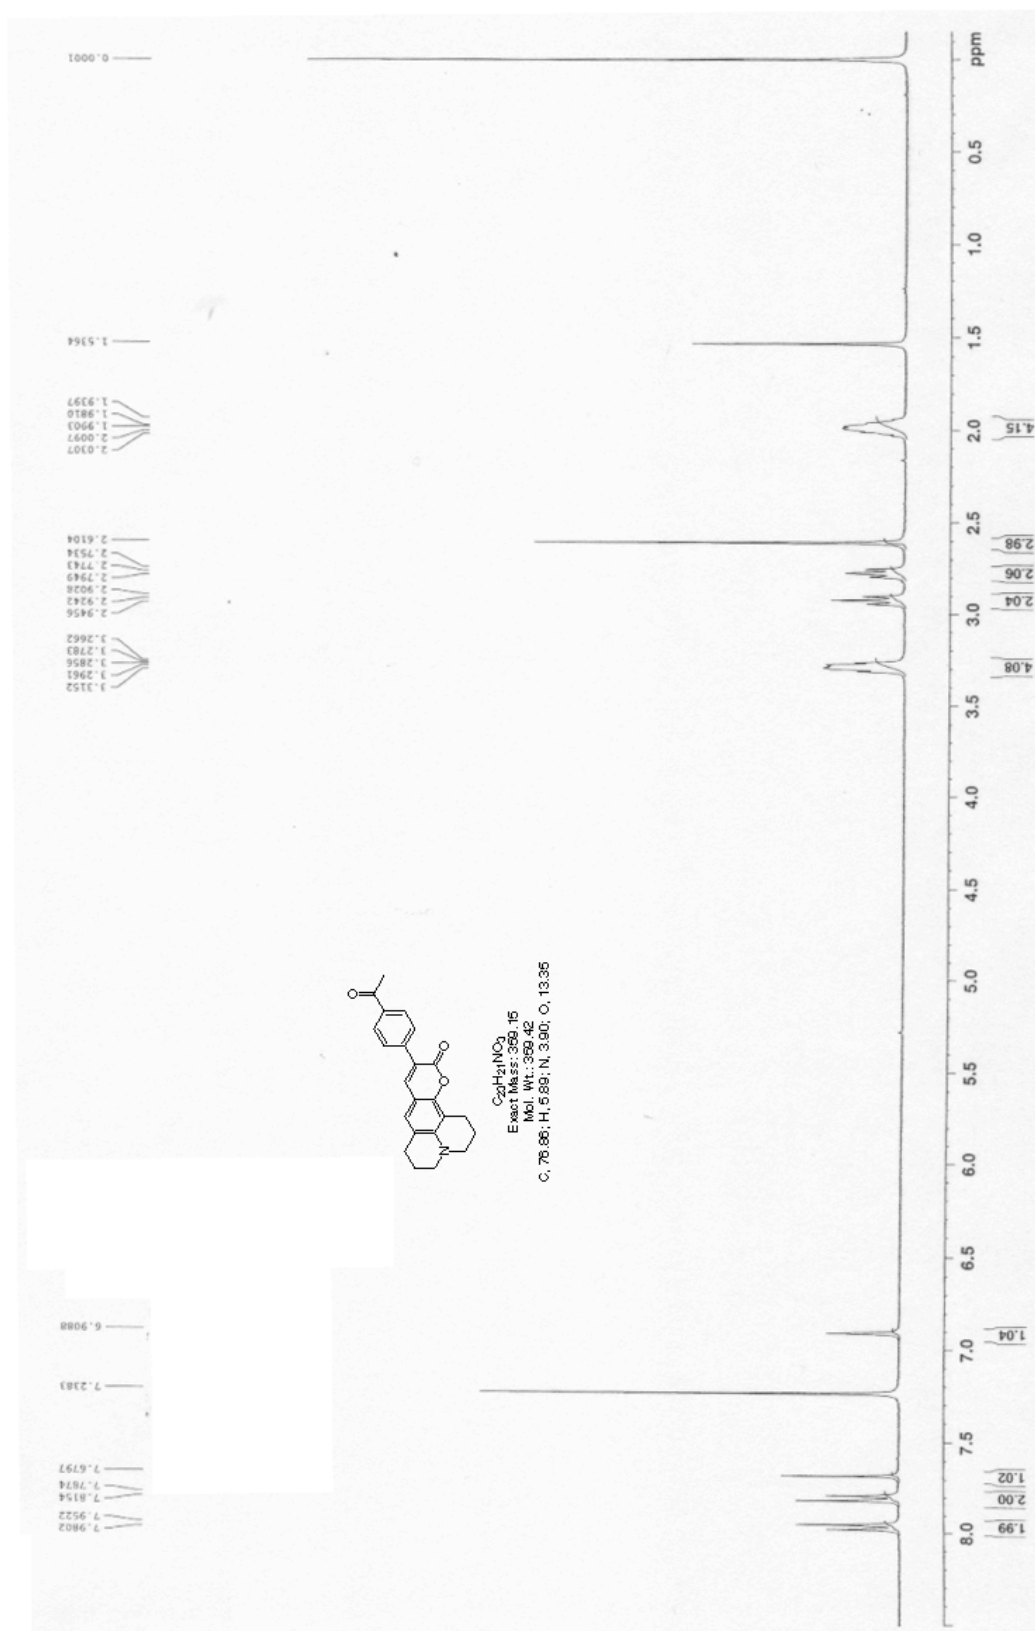

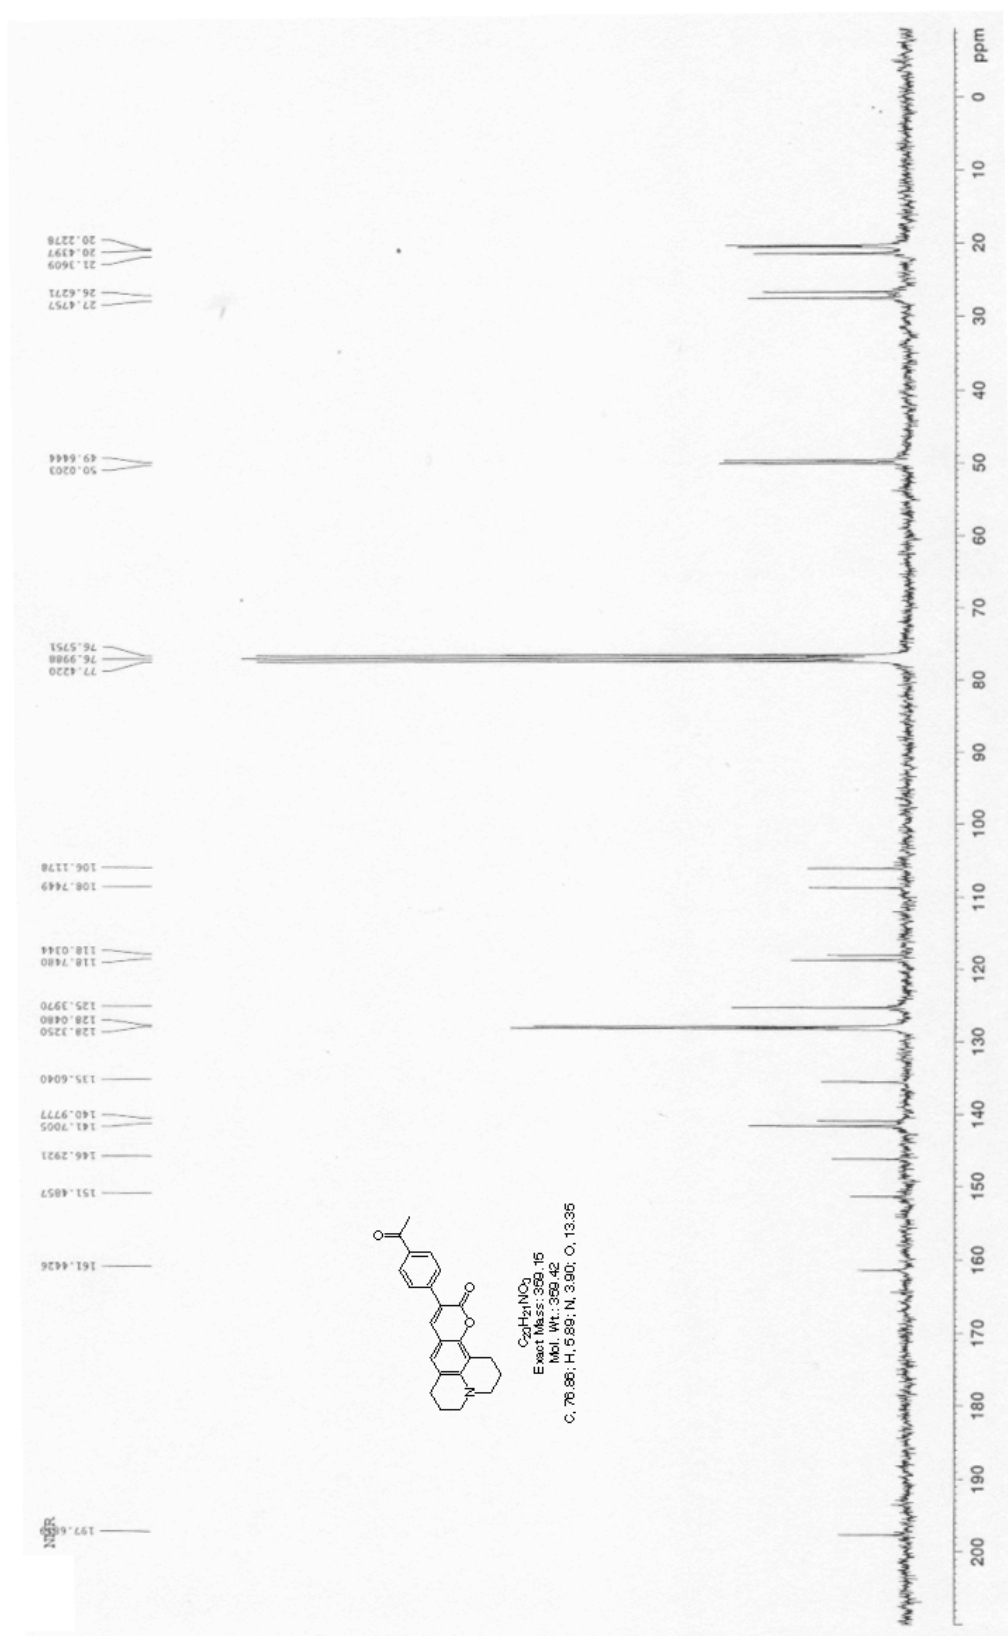

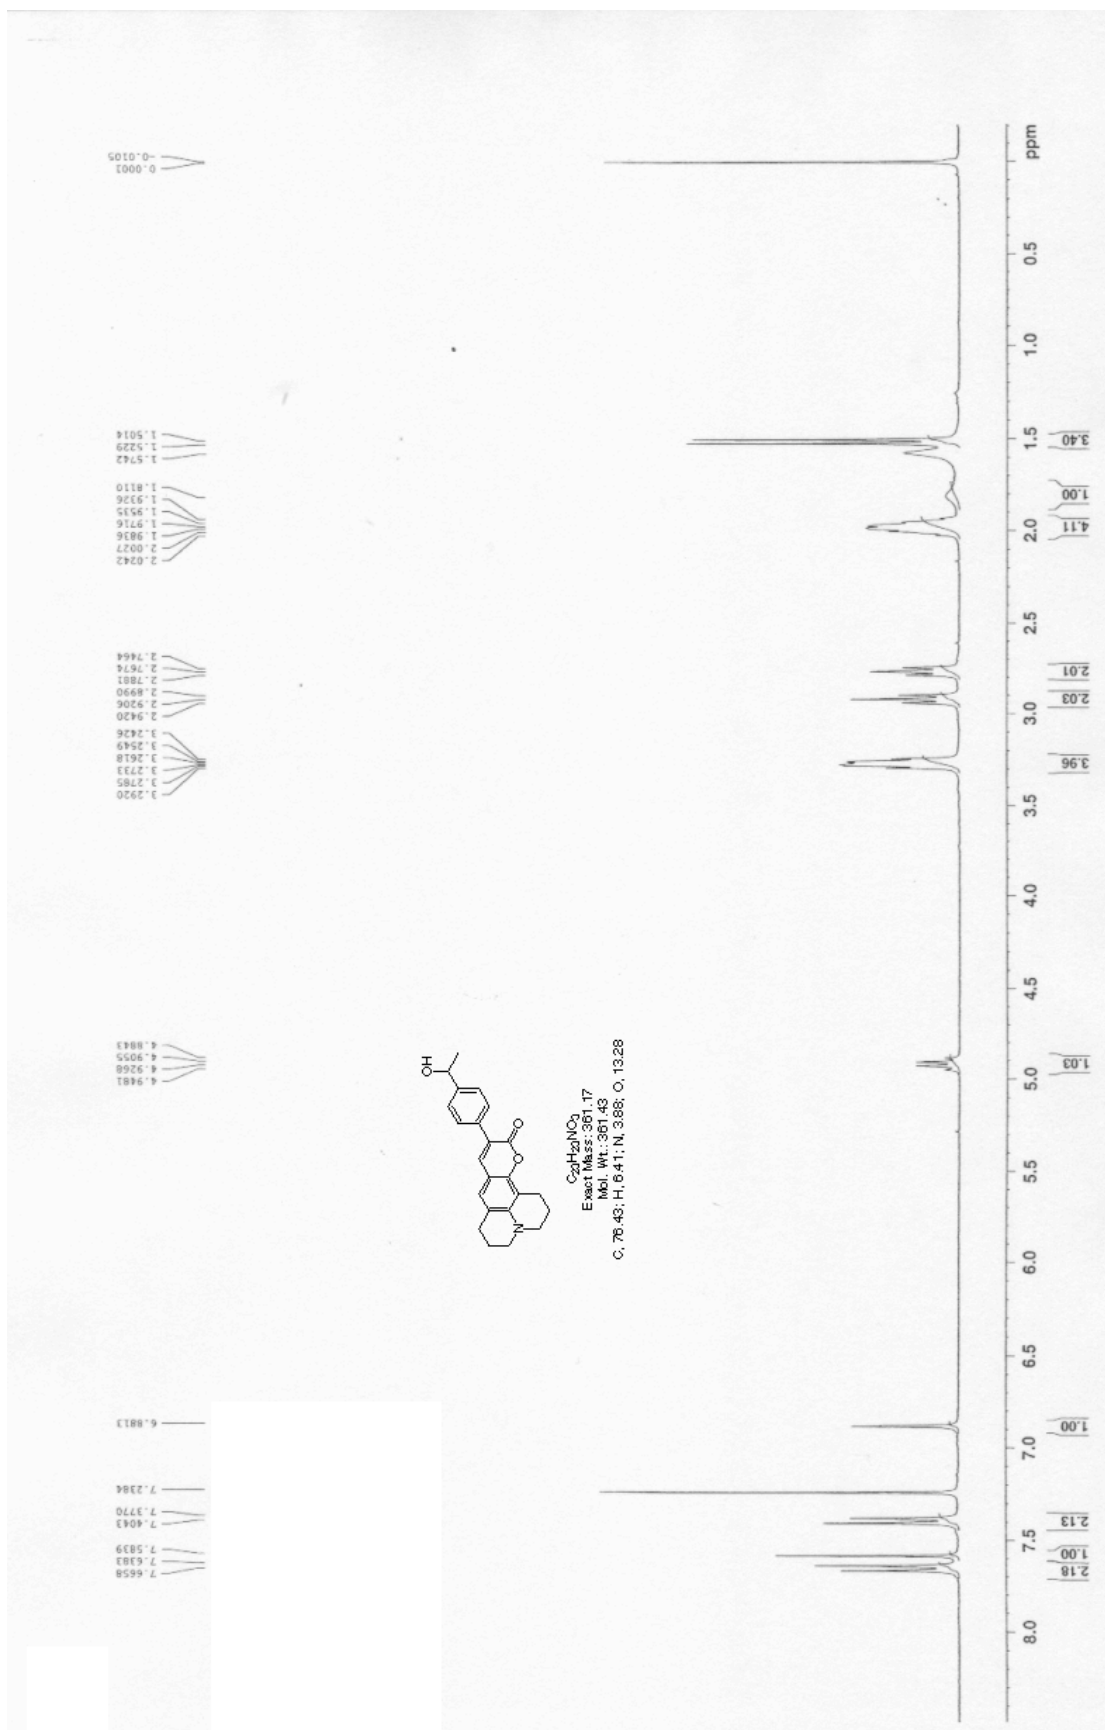

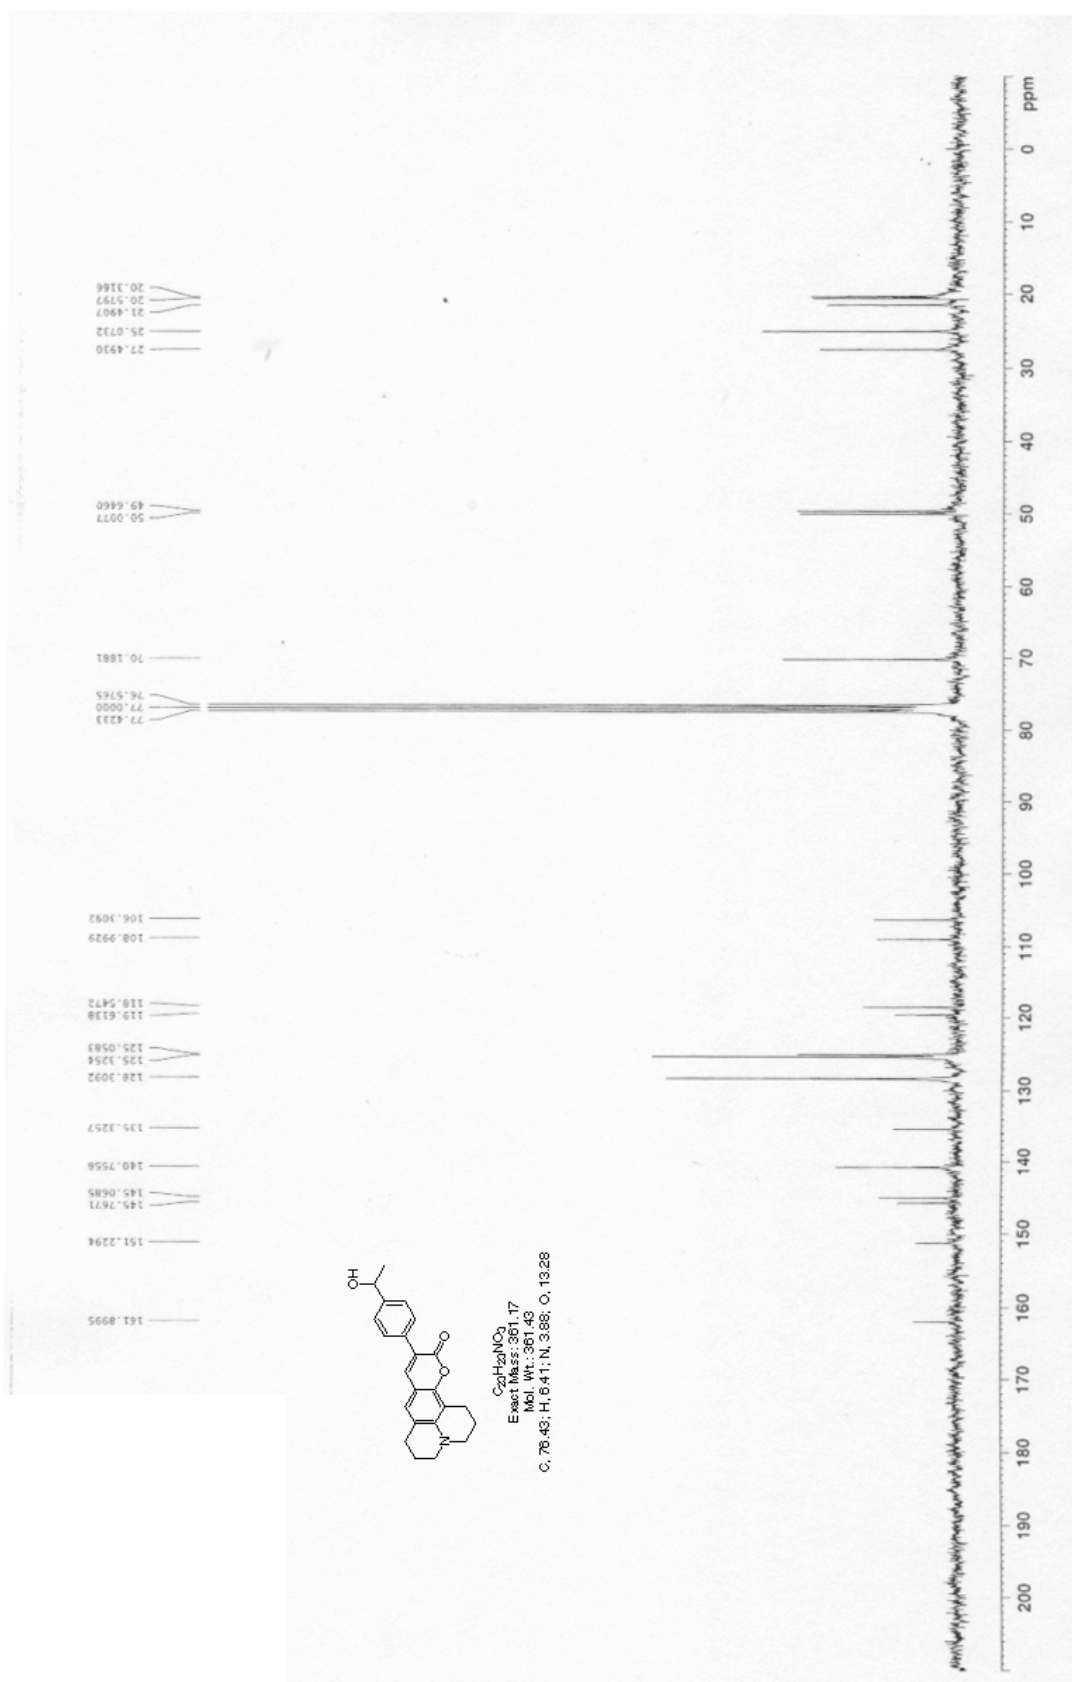



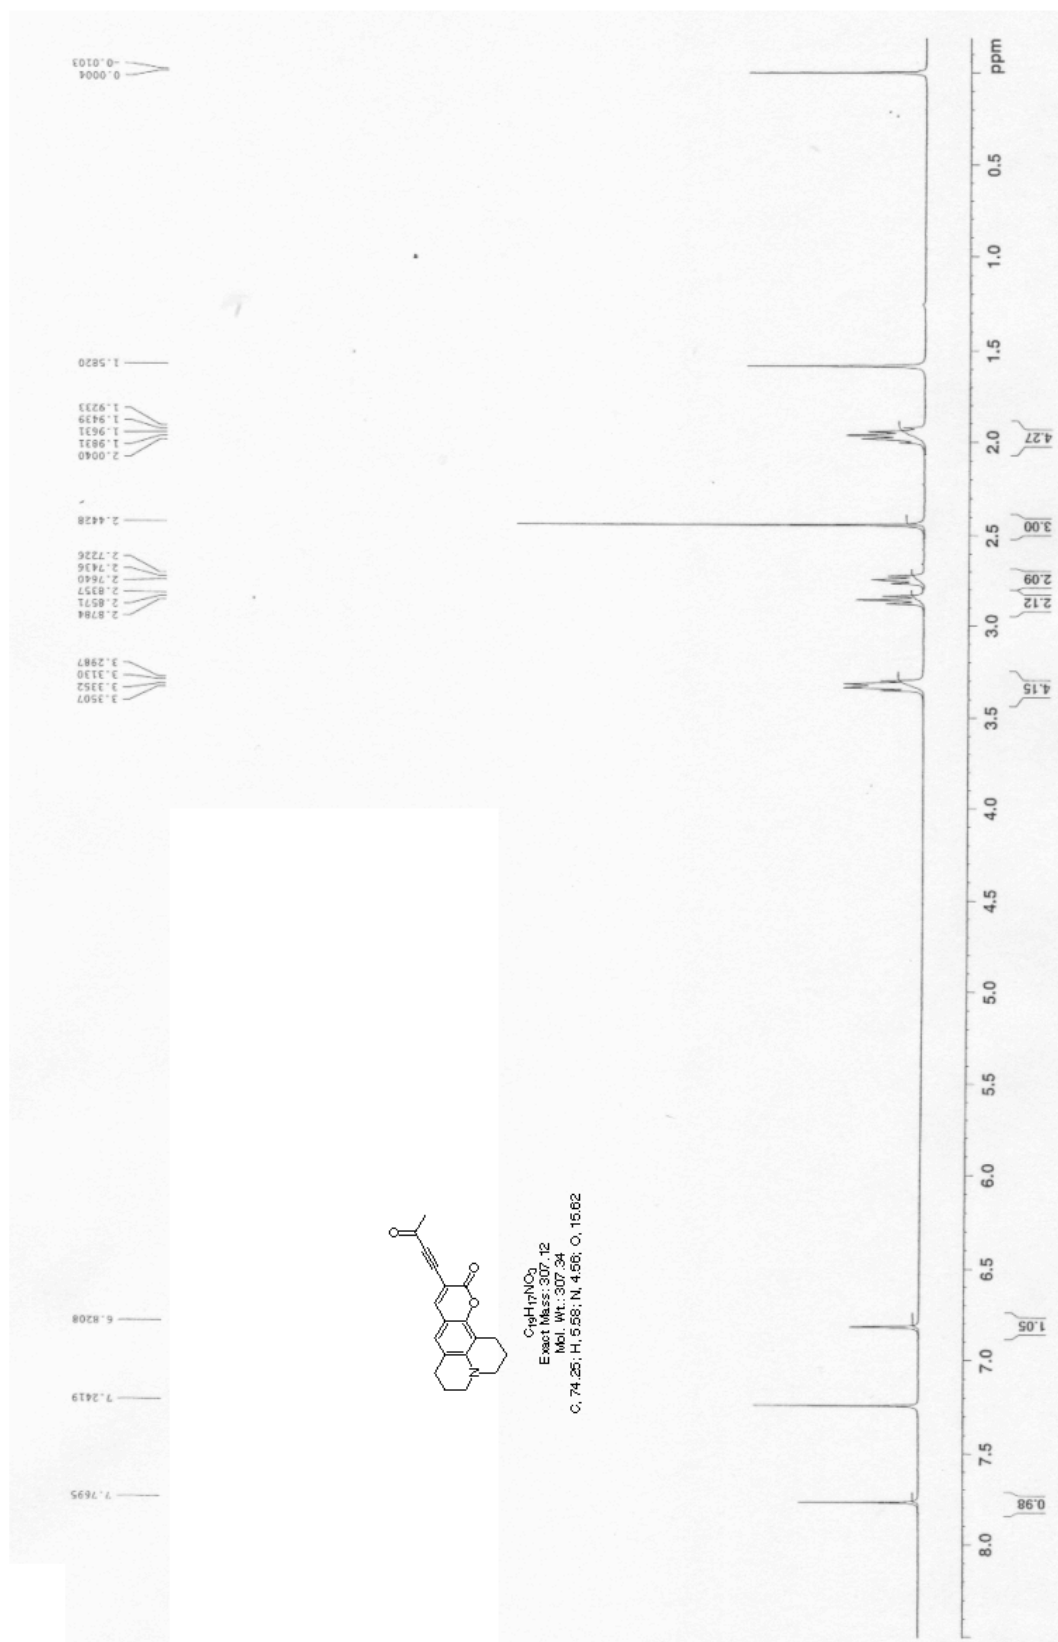

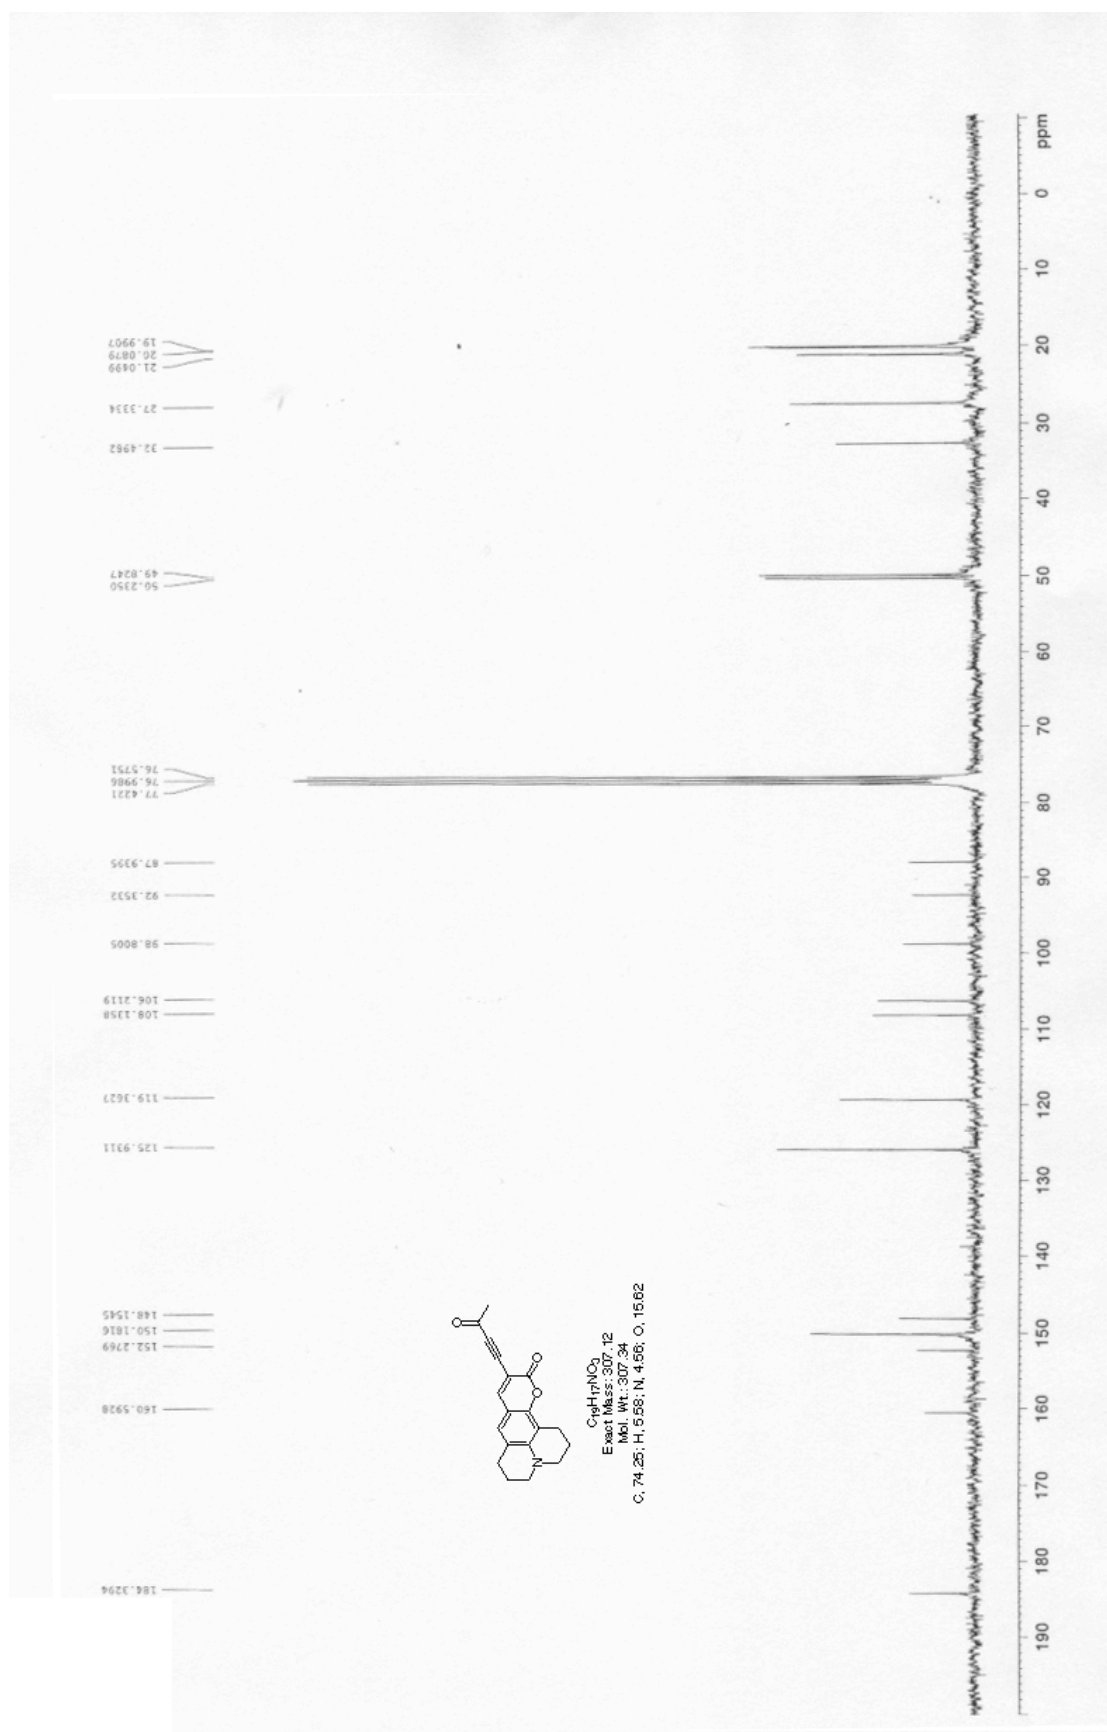



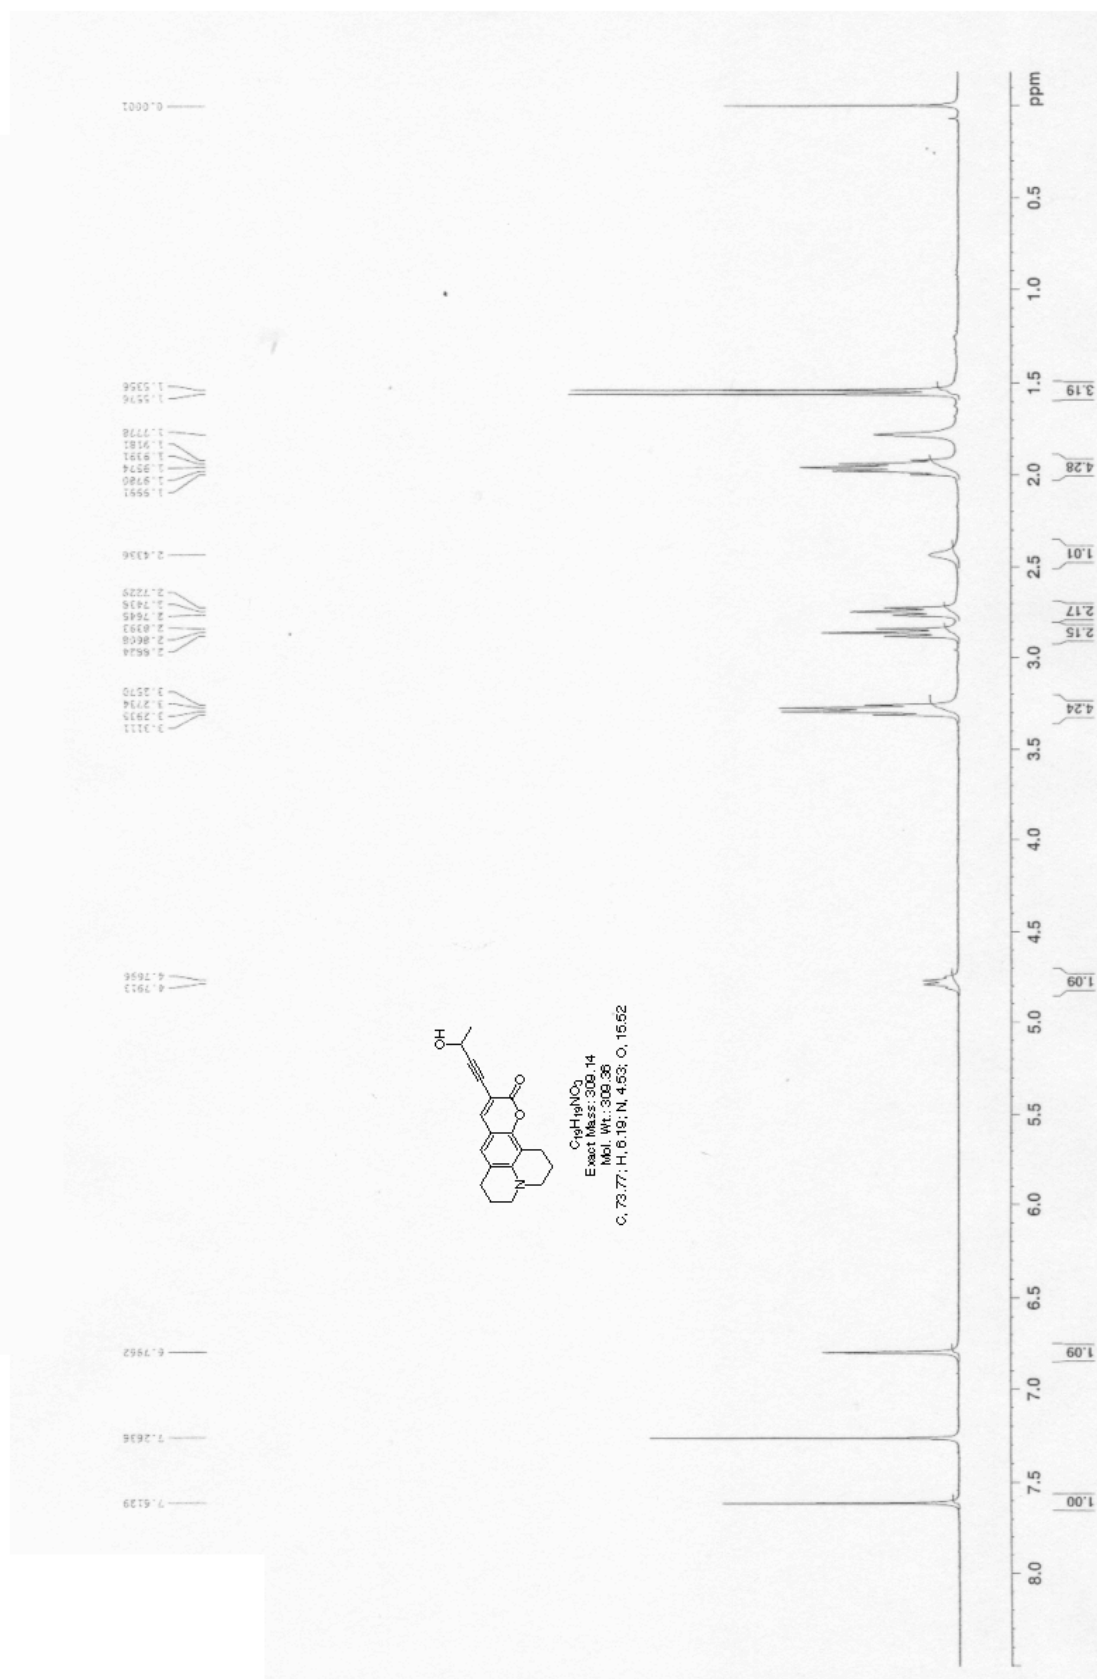

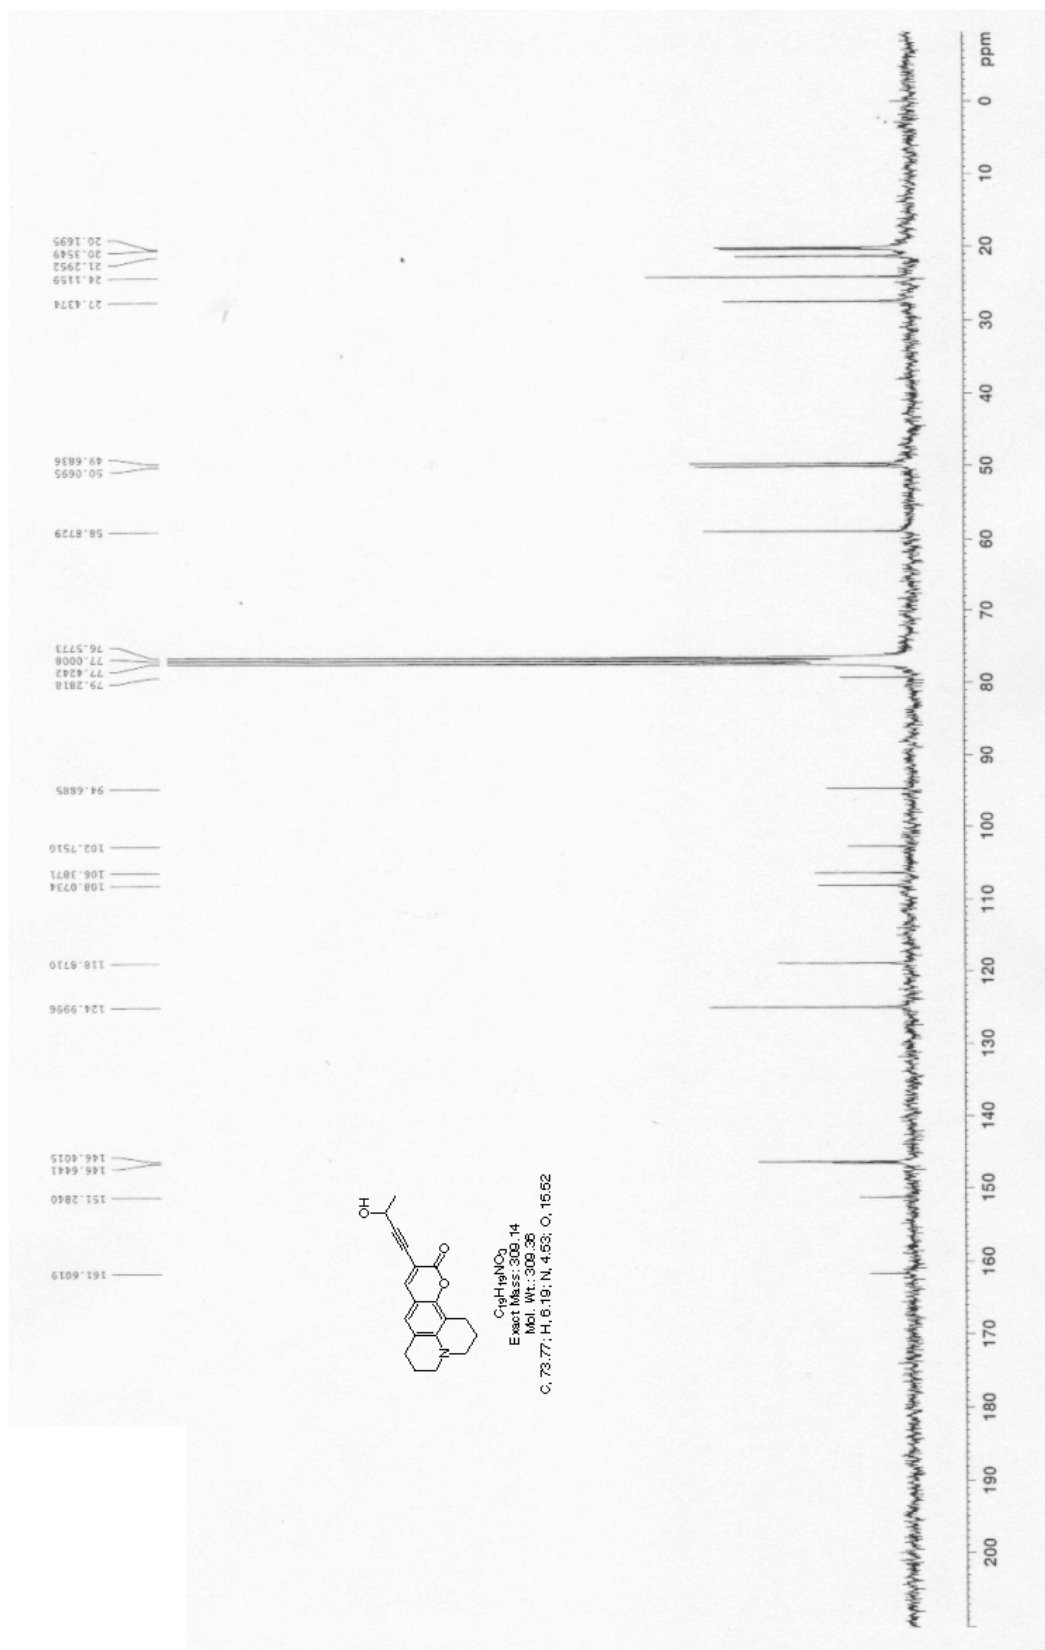

## References

1. Heinrich, G.; Schoof, S.; Gusten, H. *J. Photochem.* **1974/75**, 3, 312-320.
2. Reynolds, G. A.; Drexhage, K. H. *Opt. Commun.* **1975**, 13, 222.
3. Jacobson, A.; Petric, A.; Hogenkamp, D.; Sinur, A.; Barrio, J. R. *J. Am. Chem. Soc.* **1996**, 118, 5572-5579.
4. Hundertmark, T.; Littke, A. F.; Buchwald, S. L.; Fu, G. C. *Org. Lett.* **2000**, 2, 1729-1731.
5. Balo, C.; Fernandez, F.; Garcia-Mera, X.; Lopez, C. *Org. Prep. Proced. Int.* **2000**, 32, 367-372.
6. Coleman, R. S.; Madaras, M. L. *J. Org. Chem.* **1998**, 63, 5700-5703.
7. Wierzchowski, J.; Dafeldecker, W. P.; Holmquist, B.; Vallee, B. L. *Anal. Biochem.* **1989**, 178, 57-62.
8. <http://www.erithacus.com/grafit>
9. Wilkinson, G. N. *Biochem. J.* **1961**, 80, 324-332.
10. Yee, D. J.; Balsanek, V.; Sames, D. *unpublished results*.
